# Supplementary material for: A hot carrier perovskite solar cell with efficiency exceeding 27% enabled by ultrafast hot hole transfer with phthalocyanine derivatives
Source: Royal Society of Chemistry journal article supplement (doi:10.1039/d4ee01839g), 2024-01-01
Supplement: d4ee01839g1.pdf [file d4ee01839g1.pdf]

## Supplementary Information

# Hot Carrier Perovskites Solar Cell with Efficiency Exceeding 27% Enabled by Ultrafast Hot Hole Transfer with Phthalocyanines Derivatives

Shaokuan Gong<sup>1†</sup>, Geping Qu<sup>2,3†</sup>, Ying Qiao<sup>2†</sup>, Yifan Wen<sup>1</sup>, Yuling Huang<sup>1</sup>, Siyuan Cai<sup>2</sup>, Letian Zhang<sup>2</sup>, Kui Jiang<sup>4</sup>, Shang Liu<sup>1</sup>, Meng Lin<sup>1</sup>, Matthew C. Beard<sup>5</sup>, Zong-Xiang Xu<sup>2\*</sup>, Xihan Chen<sup>1\*</sup>

<sup>1</sup> Shenzhen Key Laboratory of Intelligent Robotics and Flexible Manufacturing Systems, SUSTech Energy Institute for Carbon Neutrality, Department of Mechanical and Energy Engineering, Southern University of Science and Technology, Shenzhen, Guangdong 518055, China.

<sup>2</sup> Department of Chemistry, Southern University of Science and Technology, Shenzhen, Guangdong 518055, China.

<sup>3</sup> School of Chemistry and Chemical Engineering, Harbin Institute of Technology, Harbin, 150001, China.

<sup>4</sup> Department of Materials Science and Engineering, City University of Hong Kong, Kowloon, 999077, Hong Kong

<sup>5</sup> National Renewable Energy Laboratory, Golden, CO, 80401, United States.

\*Corresponding author. Email: [xuzx@sustech.edu.cn](mailto:xuzx@sustech.edu.cn); [chenxh@sustech.edu.cn](mailto:chenxh@sustech.edu.cn)

†These authors contributed equally to this work.

# Table of Contents

|                                                                     |     |
|---------------------------------------------------------------------|-----|
| 1. <b>Materials, Method and Modelling details</b> .....             | S1  |
| 1.1 Materials.....                                                  | S1  |
| 1.2 Instruments.....                                                | S1  |
| 1.3 Synthesis of phthalocyanine compounds.....                      | S1  |
| 1.4 Perovskite Solar Cell Fabrications.....                         | S3  |
| 1.5 Film characterization.....                                      | S5  |
| 1.6 TA and TR spectroscopy measurement.....                         | S5  |
| 1.7 TR kinetics diffusion-surface extraction modelling.....         | S6  |
| 1.8 Device characterization.....                                    | S7  |
| 1.9 Computational methods.....                                      | S8  |
| 2. <b>Figure S1 to S27</b> .....                                    | S9  |
| 2.1 Figure S1-S2 NMR of the HTL compounds.....                      | S9  |
| 2.2 Figure S3 MALDI-TOF mass spectrum of SBUc.....                  | S11 |
| 2.3 Figure S4-S8 SEM, UV-Vis, XRD, UPS and XPS.....                 | S12 |
| 2.4 Figure S9 TA kinetics at low carrier density.....               | S17 |
| 2.5 Figure S10 Transient reflection kinetics.....                   | S18 |
| 2.6 Figure S11 TA spectra at high carrier density.....              | S19 |
| 2.7 Figure S12 TA kinetics at high carrier density.....             | S20 |
| 2.8 Figure S13-14 TR kinetics at high carrier density.....          | S21 |
| 2.9 Figure S15-18 PV performances.....                              | S23 |
| 2.10 Figure S19-S21 J-V curves under various irradiance levels..... | S29 |
| 2.11 Figure S22-S23 XPS of Pb 4f.....                               | S32 |
| 2.12 Figure S24-S25 Molecular orientation.....                      | S34 |
| 2.13 Figure S26-S27 PL and TRPL of FA based perovskites.....        | S36 |
| 3. <b>Table S1 to S10</b> .....                                     | S38 |
| 3.1 Table S1-S2 SEV values at low carrier density.....              | S38 |
| 3.2 Table S3-S4 SEV values at various carrier density.....          | S39 |
| 3.3 Table S5-S8 PV performances.....                                | S40 |
| 3.4 Table S9 XPS data table.....                                    | S43 |
| 3.5 Table S10 TRPL fitting data.....                                | S44 |
| 3.6 Table S11 Adsorption Energy.....                                | S45 |
| 4. <b>References</b> .....                                          | S46 |

## 1. Supplementary Notes- Materials, Method and Modelling details

### 1.1 Materials

Unless specified otherwise, all materials were used as received. The materials used in the experiments included: cesium iodide (CsI; 99.999%, Sigma-Aldrich), Rubidium iodide (RbI; 99.9%, Sigma-Aldrich), methylammonium iodide (MAI; 99.5%, Xi'an Polymer Light Technology Corp.), formamidinium iodide (FAI; 99.5%, Xi'an Polymer Light Technology Corp.), dodecylamine hydroiodide (DDAI; 99.5%, Xi'an Polymer Light Technology Corp.), 2-phenylethanamine hydroiodide (PEAI; 99.5%, Xi'an Polymer Light Technology Corp.), polymethyl methacrylate (PMMA; 99%; BIDE), Lead iodide (PbI<sub>2</sub>; 99.99%, Xi'an Polymer Light Technology Corp.), Methylammonium chloride (MACl; 99.99%, Xi'an Polymer Light Technology Corp.), Potassium hexafluorophosphate (KPF<sub>6</sub>; 99.99%, Sigma-Aldrich), Ammonium chloride (NH<sub>4</sub>Cl; 99.5%, Sigma-Aldrich), bis(trifluoromethane)sulfonimide lithium salt (LiTFSI; 99%, Xi'an Polymer Light Technology Corp.), cobalt(III) tris(bis(trifluoromethylsulfonyl)imide) (FK209; 99%, Xi'an Polymer Light Technology Corp.), Spiro-OMeTAD (99.8%, Xi'an Polymer Light Technology Corp.), deionized water (H<sub>2</sub>O; Alfa Aesar), Tin(II) chloride dihydrate (SnCl<sub>2</sub>·2H<sub>2</sub>O; 98%, Alfa Aesar), N,N-dimethylformamide (DMF; 99.8%, Sigma-Aldrich), dimethyl sulfoxide (DMSO; 99.9%, Sigma-Aldrich), ethanol (99.5%; Sigma-Aldrich), isopropanol (IPA; 99.5%; Sigma-Aldrich), chlorobenzene (CB; 99.8%; Sigma-Aldrich), 1,2-dichlorobenzene (99%, Sigma-Aldrich), acetone (99.8%; MERCK), 4-tert-butylpyridine (tBP; Sigma-Aldrich).

### 1.2 Instruments

NMR spectra were recorded on a Bruker AVANCE III 400M, and the chemical shifts were referenced internally using the residual solvent resonances. Mass spectra (MS) were recorded using a Voyager Elite MALDI-TOF mass spectrometer. Elemental analysis was performed using a Vario MICRO analyzer. The UV-vis spectra were recorded using a PerkinElmer Lambda750S spectrophotometer. The morphology of the prepared samples was also analysed using scanning electron microscopy (SEM, ZEISS\_MERLIN). The contact angle measurements of the perovskites were performed using a drop shape analyzer (DSA 25S, KRUS).

### 1.3 Synthesis of phthalocyanine compounds

Unless specified otherwise, all materials were used as received. Acetone was purchased from YONGHUA CHEMICAL CO., LTD. Other organic solvents and CuCl<sub>2</sub> were purchased from

Adamas-beta. 1-Butanethiol, 3,6-dihydroxyphthalonitrile, 4-methylbenzenesulfonyl chloride, and potassium carbonate were purchased from Bide pharmatech Ltd. 1,8-Diazabicyclo-[5,4,0]-undec-7-ene (DBU) was obtained from TCI (Shanghai, China). Copper (II) phthalocyanine (**Pristine Pc**, sublimed grade 99%) was purchased from Aldrich; Octal-methyl substituted Copper (II) Phthalocyanine (**Me<sub>2</sub>Pc**) and methoxytriphenylamine-substituted copper phthalocyanine (**SMePc**) were synthesized and purified by reported procedure;<sup>1,2</sup> 1,4,8,11,15,18,22,25-octakis(butylthio)-substituted copper phthalocyanine (**SBuPc**) was synthesized and purified according to modified reported procedure. (**Scheme S1**)<sup>3</sup>

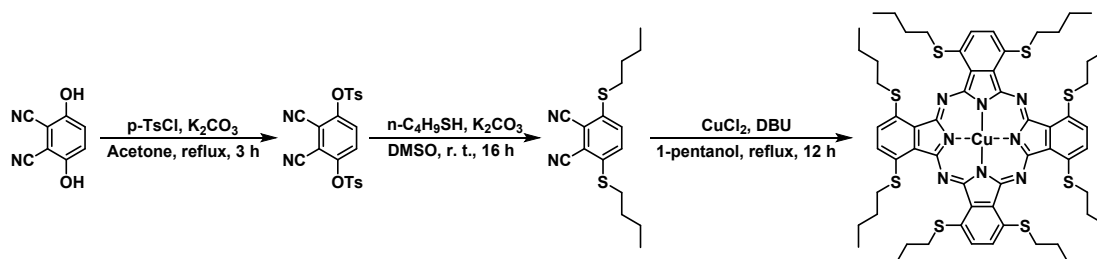

**Scheme S1.** Synthetic routes of SBuPc.

### 1.3.1 Synthesis of 3,6-bis(4'-methylphenylsulfonyloxy)phthalonitrile

4-Methylbenzenesulfonyl chloride (5.1 g, 27 mmol), 3,6-dihydroxyphthalonitrile (2.1 g, 13 mmol), potassium carbonate (6.9 g, 50 mmol), and acetone (30 mL) were added to an oven-dried 100 mL two-neck round-bottom flask. The mixture was heated to reflux for 3 h. After cooling, the mixture was poured into 100 mL deionized water and stirred for 30 min. The crude product was filtrated and rinsed with deionized water (4 × 30 mL) and acetone (3 × 2 mL) to afford colourless solid (5.0 g, 82%). <sup>1</sup>H NMR (400 MHz, CDCl<sub>3</sub>) δ/ppm 7.83 (d, J = 8.4 Hz, 4H), 7.81 (s, 2H), 7.41 (d, J = 8.1 Hz, 4H), 2.50 (s, 6H). (**Supplementary Fig. S1**)

### 1.3.2 Synthesis of 3,6-bis(butylthio)phthalonitrile

An oven-dried 250 mL two-neck round-bottom flask was charged with 1-butanethiol (2.7 g, 30 mmol), potassium carbonate (5.5 g, 40 mmol), and 100 mL DMSO. The mixture was stirred for 30 min at room temperature. Then 3,6-bis(4'-methylphenylsulfonyloxy)phthalonitrile (4.7 g, 10 mmol) was slowly added to the mixture in portions and the mixture was allowed to stir at room temperature for 16 h. After reaction, the mixture was poured into brine, stirred for 10 min, and extracted with dichloromethane (3 × 150 mL). The combined organic layers were dried by Na<sub>2</sub>SO<sub>4</sub>, filtrated, and concentrated under reduced pressure. The crude product was purified by column chromatography on silica gel (eluent: dichloromethane/petroleum ether). After recrystallization in

dichloromethane/methanol, bright-yellow crystalline solid (2.5 g, 82%) was obtained as product.  $^1\text{H}$  NMR (400 MHz,  $\text{CDCl}_3$ )  $\delta$ /ppm 7.50 (s, 2H), 3.02 (t,  $J = 7.3$  Hz, 4H), 1.66 (p,  $J = 7.3$  Hz, 4H), 1.48 (h,  $J = 7.3$  Hz, 4H), 0.94 (t,  $J = 7.3$  Hz, 6H). (**Supplementary Fig. S2**)

### 1.3.3 Synthesis of SBuPc

3,6-bis(butylthio)phthalonitrile (0.50 g, 1.65 mmol, 3 equiv.), copper(II) chloride (0.074 g, 0.55 mmol, 1 equiv.), DBU (1 mL), 1-pentanol (2 mL) were added to an oven-dried 25 mL round-bottom flask. The mixture was heated to reflux for 12 h. After cooling, MeOH/ $\text{H}_2\text{O}$  (1/1, 20 mL) was added to the mixture. The precipitate was filtered, washed with MeOH ( $3 \times 5$  mL), and redissolved in dichloromethane. Further purification was carried out by column chromatography on silica gel (eluent: dichloromethane/MeOH) to obtain purple solid (0.32 g, 61%) as product. MS (MALDI-TOF):  $m/z$  calcd. 1279.357 [ $\text{M}$ ] $^+$ ; found 1279.417. (**Supplementary Fig. S3**) Elemental analysis calcd. (%) for  $\text{C}_{64}\text{H}_{80}\text{CuN}_8\text{S}_8$ : C, 59.99; H, 6.29; N, 8.74. Found: C, 60.24; H, 6.156; N, 8.53.

## 1.4 Perovskite Solar Cell Fabrications

Planar n-i-p perovskite solar cells (PSCs) were fabricated using ITO,  $\text{SnO}_2$ , perovskite, Spiro-OMeTAD/Pcs and gold (Au) as cathode, electron transport layer (ETL), light absorber layer, hole transport layer (HTL) and anode, respectively, according to a modified reported procedure.

### 1.4.1 Fabrication of ETL

ITO glasses (Yingkou OPV Tech New Energy Co., Ltd, China) were washed with cleaning fluid, deionized water, ethanol, acetone, and isopropanol sequentially. And then the ITO were treated with UV–ozone for 20 minutes.  $\text{SnCl}_2 \cdot 2\text{H}_2\text{O}$  solution (0.1 M) was prepared by dissolving  $\text{SnCl}_2 \cdot 2\text{H}_2\text{O}$  in anhydrous alcohol in a flask, then the solution was stirred at room temperature or  $80^\circ\text{C}$  with the neck of flask sealed to prevent  $\text{O}_2$  and  $\text{H}_2\text{O}$  into the solution for 3 hours. To obtain  $\text{SnO}_2$  sol-gel solution, the just dissolved  $\text{SnCl}_2 \cdot 2\text{H}_2\text{O}$  solution was transferred to an open reflux apparatus, then refluxing for overnight. When the reaction is over, the product was aged for over 24 hours at room temperature. The as-prepared sol-gel solution was then spin-coated (3000 rpm for 30 s) and thermal treatment at  $150^\circ\text{C}$  for 30 minutes to form ETL and then the as-deposited ETL was treated with UV–ozone for 20 minutes. The 1 mg/mL  $\text{NH}_4\text{Cl}$  aqueous solution was spin-coated on the ETL surface, followed by thermal treatment at  $80^\circ\text{C}$  for 20 minutes, then the as-deposited  $\text{NH}_4\text{Cl}$  was treated with UV–ozone for 20 minutes. Finally, the ITO/ $\text{SnO}_2$  substrates were transferred to the Ar glove box ( $\text{H}_2\text{O}$  and  $\text{O}_2$  content  $< 1$  ppm) for perovskite layer deposition.

## 1.4.2 Fabrication of Perovskite Layer

The perovskite film was deposited on ITO/SnO<sub>2</sub> via a solvent engineering method. The perovskite precursor solution for MAPbI<sub>3</sub>, the perovskite precursor solution comprised 1.43 mM MAPbI<sub>3</sub> (MAI: 227 mg; PbI<sub>2</sub>: 659 mg), 1 mg KPF<sub>6</sub> and 5% mM MACl (5 mg) in 1 mL of DMF/DMSO (9:1, v/v). The MAPbI<sub>3</sub> film was prepared and spin-coated in two steps, namely, 1000 rpm for 5 s and 4000 rpm for 20 s, the acceleration is the maximum. Then, with 15 s of spin time remaining, anti-solvent (300 μL chlorobenzene for ITO area of 20 mm × 22 mm) was slowly dispensed onto the middle of the substrate and the films were annealed at 100 °C 15 minutes. The thickness of the as-fabricated MAPbI<sub>3</sub> layer was determined to be ~500 nm by Ambios Technology (Santa Cruz, CA) XP-2 profilometer. For FAPbI<sub>3</sub>, the perovskite precursor solution comprised 1.6 mM FAPbI<sub>3</sub> (FAI: 275 mg; PbI<sub>2</sub>: with 5% mole excessive lead iodide, 774 mg) and 20% mM MACl (22 mg) in 1 mL of DMF/DMSO (4:1, v/v). The FAPbI<sub>3</sub> film was prepared and spin-coated in two steps, namely, 1000 rpm for 5 s and 5000 rpm for 35 s, the acceleration is the maximum. Then, with 8–9 s of spin time remaining, anti-solvent (600 μL for ITO area of 20 mm × 22 mm) was slowly dispensed onto the middle of the substrate and the films were annealed at 150 °C 20 minutes. The anti-solvent is composed of ether and chlorobenzene in a ratio of 95:5. The thickness of the as-fabricated FAPbI<sub>3</sub> layer was determined to be ~800 nm by Ambios Technology (Santa Cruz, CA) XP-2 profilometer and cross-sectional SEM images. For Cs<sub>0.04</sub>Rb<sub>0.02</sub>MA<sub>0.02</sub>FA<sub>0.92</sub>PbI<sub>3</sub> (CsRbMAFA), the perovskite precursor solution comprised 1.8 mM CsRbMAFA (CsI: 18.71 mg; RbI: 7.65 mg; MAI: 5.72 mg; FAI: 248.78 mg; PbI<sub>2</sub>: with 5% mole excessive lead iodide, 871.31 mg) and 14% mM MACl (17.02 mg) in 1 mL of DMF/DMSO (4:1, v/v). The CsRbMAFA film was prepared and spin-coated in two steps, namely, 1000 rpm for 5 s and 6000 rpm for 30 s, the acceleration is the maximum. Then, with 8–9 s of spin time remaining, anti-solvent (600 μL for ITO area of 20 mm × 22 mm) was slowly dispensed onto the middle of the substrate and the films were annealed at 110 °C 35 minutes. The anti-solvent is composed of ether and chlorobenzene in a ratio of 95:5. For FAPbI<sub>3</sub> and CsRbMAFA interfacial passivation of perovskite, the solution is dynamically spun on the perovskite film at 5000 rpm and annealed at 100 °C for 1 minute, the passivation solution is to dissolve 4 mg of PEAI and 1 mg of DDAI in 1 mL of isopropyl alcohol. And interface passivation is not applied to MAPbI<sub>3</sub>. Finally, 0.5 mg/mL PMMA solution (in chlorobenzene) was dynamically spun onto 5000 rpm perovskite film and annealed at 100 °C for

5 minutes.

### 1.4.3 Fabrication of HTL

The HTL of doped Spiro-OMeTAD was deposited on the top of perovskite layer using spin-coating process (3000 rpm for 30 seconds) with a solution by dissolving 72.3 mg of Spiro-OMeTAD, 28.8  $\mu\text{L}$  4-tert-butylpyridine, 17.5  $\mu\text{L}$  lithium bis(trifluoromethylsulfonyl)imide acetonitrile solution (520 mg  $\text{mL}^{-1}$ ) into 1 mL chlorobenzene. The HTL of pristine Pc and  $\text{Me}_2\text{Pc}$  was prepared by thermal evaporation, a  $\sim 50$  nm Pcs films was thermally evaporated under high vacuum ( $<10^{-5}$  Pa) on top of the devices and the thickness was monitored in-situ using quartz crystal. The HTL of SBUc and SMePc was prepared by spin-coating using a solution (optimized concentration of 20 mg/mL in dichlorobenzene) with a speed of 2500 rpm for 60 seconds to obtain a Pcs film of thickness  $\sim 60$  nm determined from ellipsometry. After the HTL deposition, the 8 nm  $\text{MoO}_3$  and 100 nm Au electrode was thermally evaporated under high vacuum ( $<10^{-5}$  Pa) on top of the devices. The device size areas were 0.10  $\text{cm}^2$ . When measuring, a 3.97  $\text{mm}^2$  non-reflective mask was used to define the accurate active cell area. For thermal annealing, the obtained PSCs based on Pcs based HTL were heated under optimized condition of 85  $^\circ\text{C}$  for 22 hours in Ar atmosphere.

### 1.5 Film characterization

Thin film grazing incidence X-ray diffraction (GIXRD) measurements of the perovskite were performed on a Smartlab 9-kW diffractometer with a Göbel mirror attachment. Irradiation of the parallel  $\text{CuK}\alpha_{1,2}$  X-ray beams was fixed at a grazing incident angle ( $\theta$ ) of  $0.500^\circ$ . The detector was independently moved to collect diffraction data in the  $2\theta$  range ( $4^\circ$ – $11^\circ$  and  $20^\circ$ – $28^\circ$ ) with a step size of  $0.03^\circ$  ( $2\theta$ ) at a fixed speed of 0.5 sec/step.

The steady-state photoluminescence spectra and TRPL decay curve measurements for perovskite films (Glass/perovskite/HTL) were performed on an FLS1000 spectrometer (Edinburgh Instruments) with excitation from a 475-nm pulsed laser. The samples were excited from the perovskite side under ambient conditions. The TRPL data were fitted with a biexponential function as following:

$$f(t) = A_1 \exp\left(\frac{-t}{\tau_1}\right) + A_2 \exp\left(\frac{-t}{\tau_2}\right)$$

where  $\tau_1$  and  $\tau_2$  represent fast-decay and slow-decay components, respectively.

Ultraviolet photo-electron spectroscopy (UPS) and X-ray photoelectron spectroscopy (XPS)

measurements were performed using an ultrahigh vacuum surface analysis system equipped with an ULVAC-PHI 5000 VersaProbe III spectrometer. UPS was performed with He I (21.22 eV) as the excitation source at an energy resolution of 50 meV. XPS used monochromatic Al K $\alpha$  radiation (1,486.6 eV). All experiments were calibrated to the Fermi edge of an atomically clean gold surface.

### 1.6 TA and TR spectroscopy measurement

The fundamental beam (800 nm, Coherent Astrella) is split in two beams. One beam is sent to an optical parametric amplifier (TOPAS, Light conversion) to generate the pump pulse, and its intensity is attenuated by two neutral density filter wheels. The other 800 nm beam is focused into a sapphire crystal to generate white light probe (450-810 nm) and detected with a CMOS detector (Timetech, TA-100). The probe pulses are delayed in time with respect to the pump pulses using a motorized translation stage mounted with a retroreflecting mirror. Probe delay can be up to ~5 ns, tuned by a delay line. The probe size is ~180  $\times$  125  $\mu$ m, and pump beam size is ~340  $\times$  440  $\mu$ m for 480 nm, ~730  $\times$  670  $\mu$ m for 600 nm and ~520  $\times$  490  $\mu$ m for 750 nm. The beam size is defined as the radius of an aperture that contains (1/e<sup>2</sup>) of the total power. The pump and probe are spatially overlapped on the surface of the sample. For TR measurement, the incident angle for pump is around 0° and probe is around 45°.

### 1.7 TR kinetics diffusion-surface extraction modelling

For any sample, the kinetics of different pump light excitation conditions are different, because the perovskite sample has different absorption coefficients for different wavelengths of light, which leads to different initial carrier distributions in the sample when the sample is first excited. This method is modified from literature.<sup>4,5</sup>

According to the Beer–Lambert law, a pump with higher photon energy always leads to a larger gradient of the initial photocarrier density and thus a faster surface decay dynamics due to a larger diffusion rate. To quantitatively describe the carrier density evolution under the various optical excitation conditions, a one-dimensional diffusion equation is employed,

$$\frac{\partial N(x,t)}{\partial t} = D \times \frac{\partial^2 N(x,t)}{\partial x^2} - \frac{N(x,t)}{\tau_B} \quad \#(1)$$

where N(x, t) is the carrier density as a function of depth (x) and time (t), D is the ambipolar diffusion coefficient and  $\tau_B$  is the bulk carrier lifetime. In comparison with the timescale for carrier diffusion, the pulsed carrier generation is assumed to be instantaneous, and the initial condition for



equation (1) is then given by

$$N(x,0) = N_0 e^{-\alpha x} \quad (2)$$

where  $N_0$  is the initial surface carrier density, such that  $N_0 = \alpha (1 - R)J_0$ , where  $J_0$  is the pump fluence and  $R$  is the reflectance at the pump-photon energy. If the traces are normalized, then  $N_0$  is equal to 1. The values for the absorption coefficient  $\alpha$  at different pump-photon energies for both samples are known.

For the polycrystalline samples, the boundary conditions are described as

$$\frac{\partial N(x,t)}{\partial x} \Big|_{x=0} = \frac{S_F}{D} \times N(0,t) \quad (3)$$

and

$$\frac{\partial N(x,t)}{\partial x} \Big|_{x=L} = -\frac{S_L}{D} \times N(L,t) \quad (4)$$

where  $L$  is the thickness of the perovskite layer that is orders of magnitude thicker than the optical penetration depth plus carrier diffusion length, and  $S$  is the surface recombination velocity (SRV). In addition, when the HTL is added, surface hole extraction occurs, which decreases the carrier concentration in the perovskite film, and this can be considered to be the effective surface extraction velocity (SEV). For higher carrier density experiments, the diffusion constant is held at constant where SEV is allowed to vary. The electron mobility in perovskites could be 10 times larger than the holes, therefore, the ambipolar diffusion will be limited by holes.

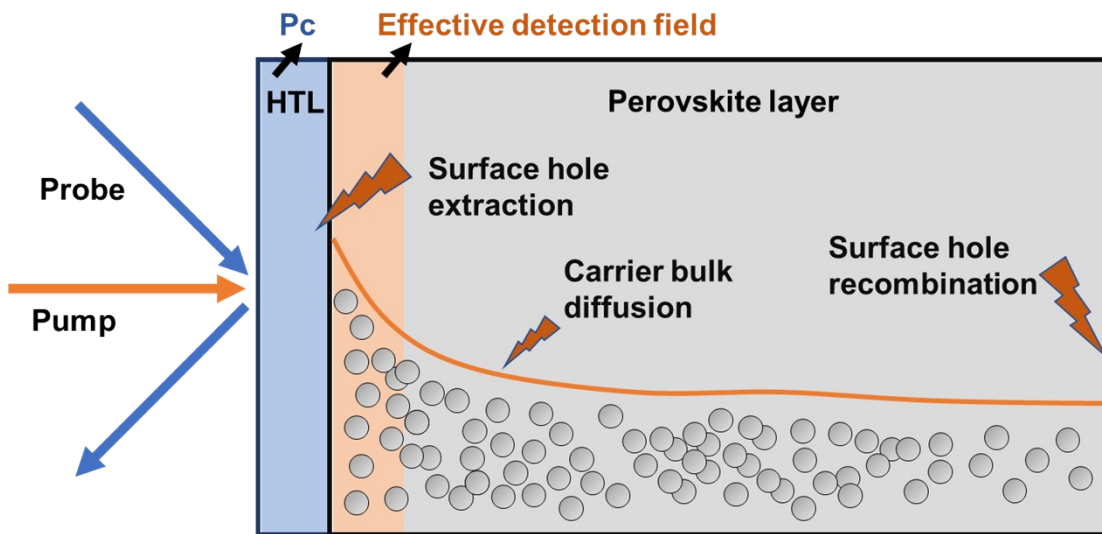

**Scheme S2.** Schematic of diffusion-recombination/extraction model

## 1.8 Device characterization

A Keithley 2400 source measure unit was used and an Oriel xenon lamp (450 W) with an AM 1.5 filter, to characterize solar cells in air under AM 1.5G illumination of  $100 \text{ mW cm}^{-2}$  (Oriel 1 kW Newport solar simulator), calibrated with a KG5 filter certified by the National Renewable Energy Laboratory. Current density–voltage (J–V) curves of all devices (active area,  $3.97 \text{ mm}^2$ ) were measured at a scan rate of  $0.1 \text{ V s}^{-1}$ .

Operational stability tests were performed at the MPP for the unencapsulated devices under AM 1.5G illumination ( $100 \text{ mW/cm}^2$ ) at  $60 \pm 10 \text{ }^\circ\text{C}$  in a  $\text{N}_2$  atmosphere within a light-emitting diode (LED)-based solar simulator. The bias at the MPP was calculated and then applied automatically. The light intensity was calibrated versus a standard silicon reference cell supplied by Newport.

The concentrated light source was obtained by focusing a xenon lamp (Solar Simulator, 94063A model) simulated white-light source including an AM 1.5G filter. The light intensity was modulated by a set of Fresnel lenses with different focal lengths and a height shift stage that can be adjusted, and the exact numeric value was determined using a solar power meter (PL-MW2000, Beijing Perfectlight Technology Co., Ltd). During the test, the cell temperature is controlled at room temperature by blowing the surface of the PSCs device with a high-speed air gas flow. To avoid the effect of parasitic resistance, the active area of the perovskite solar cells was reduced to  $\sim 1 \text{ mm}^2$ . The J–V curves were recorded with a 2601B system source meter (Keithley Instruments) via a four-wire connection mode, which overcomes resistive losses in the electrical cables, and contact resistance between the connecting pins.

## 1.9 Computational methods

The calculations were performed using the spin-polarized density functional theory (DFT) methods implemented in the CP2K package. The Perdew-Burke-Ernzerhof (PBE) functional, which is a generalized gradient approximation, was employed to describe the exchange and correlation interactions of valence electrons. The wave functions were expanded using a molecularly optimized double-zeta Gaussian basis set with a cutoff energy of 400 Ry. Dispersion interactions were accounted for using Grimme’s D3 dispersion corrections. In each self-consistent field (SCF) iteration step, the energy was converged to  $10^{-6}$  Ry, while the atomic forces were constrained to be less than  $0.02 \text{ eV/\AA}$ .

The perovskite model had dimensions of  $39.00 \times 39.00 \times 43.50 \text{ \AA}^3$ , and a vacuum of  $15.0 \text{ \AA}$  inserted along the [001] direction to avoid unphysical interactions between the slab layers. The ab

initio molecular dynamics (AIMD) simulations were performed in the canonical (NVT) ensemble using Nose-Hoover thermostats with a time step of 1.0 fs at a typical temperature of 300 K. During the simulation, DFT-optimized structures were adopted as initial structures to achieve equilibration trajectories for approximately 7 ps. The radial distribution functions (RDFs) between the S atoms in the Pcs molecules and Pb atoms on perovskite surface was analyzed, and the data were collected from the final 5 ps. Charge density difference ( $\Delta\rho$ ) of Pcs molecules on the perovskite were calculated as,  $\Delta\rho = \rho_{(\text{Pcs/PVK})} - \rho_{(\text{Pcs})} - \rho_{(\text{PVK})}$ . The charge density accumulation and depletion areas are indicated in yellow and cyan, respectively. The isosurface value is set to  $\pm 0.004 \text{ e}/\text{\AA}^3$ .

## 2. Supplementary Figs. S1 to S31

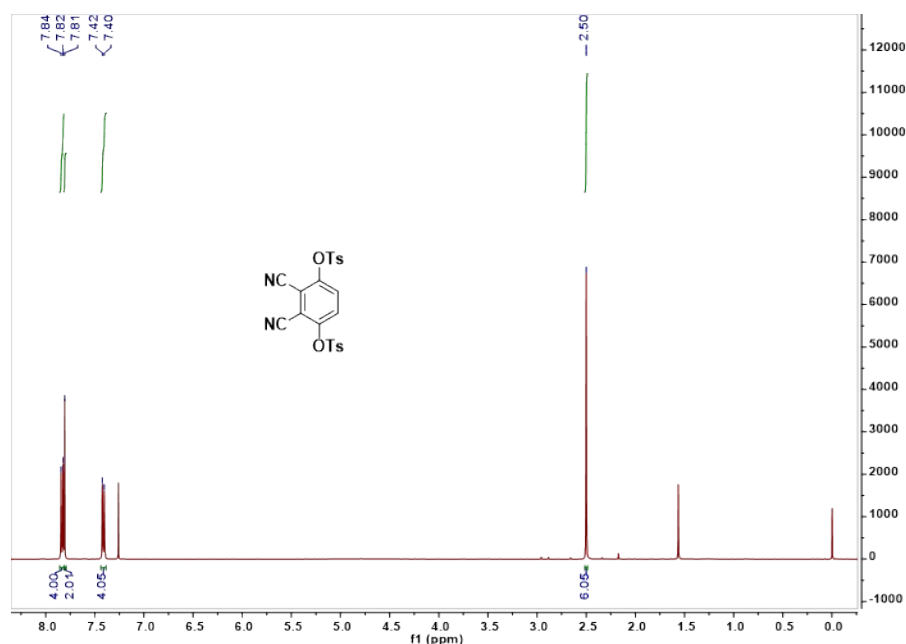

**Figure S1.** <sup>1</sup>H NMR spectrum (400 MHz, CDCl<sub>3</sub>) of 3,6-bis(4'-methylphenylsulfonyloxy)phthalonitrile.

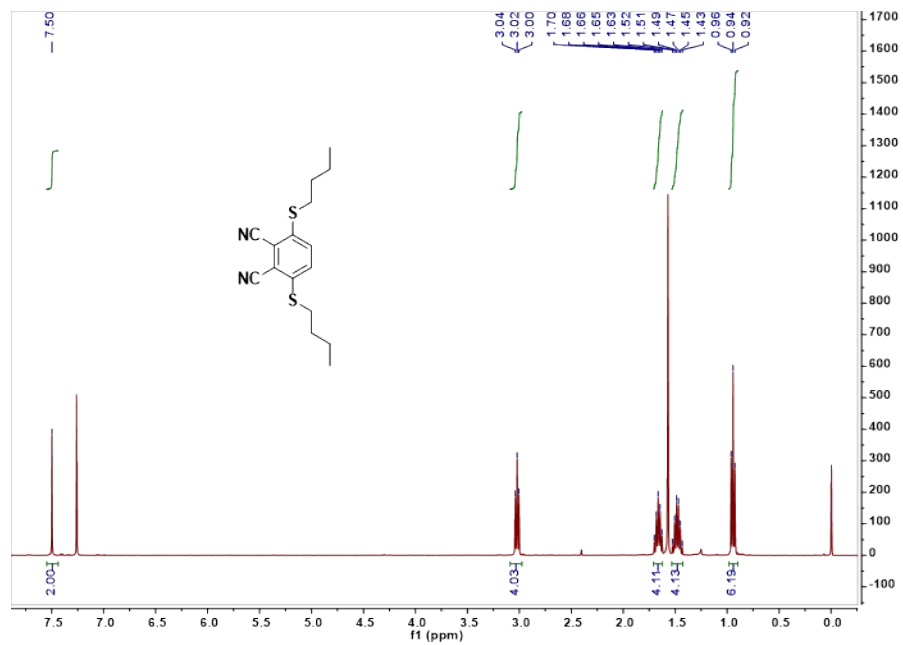

**Figure S2.**  $^1\text{H}$  NMR spectrum (400 MHz,  $\text{CDCl}_3$ ) of 3,6-bis(butylthio)phthalonitrile.

| Cpd.       | Experiment       | Elemental Analysis |       |      |
|------------|------------------|--------------------|-------|------|
|            |                  | C%                 | H%    | N%   |
|            | Calculated Value | 59.99              | 6.29  | 8.74 |
| CuPc-NPSC4 | Experiment 1     | 60.24              | 6.156 | 8.53 |
|            | Experiment 2     | 60.42              | 6.229 | 8.59 |

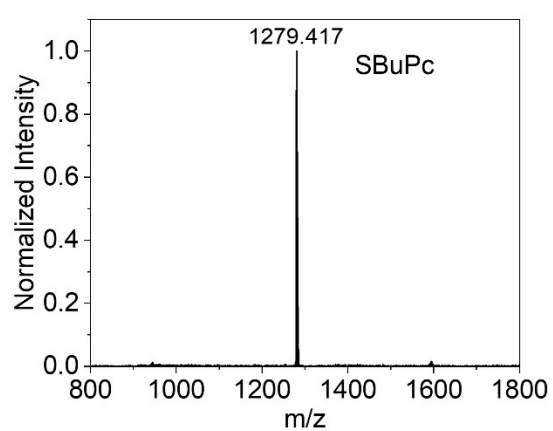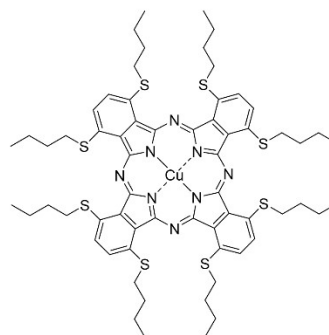

Exact mass: 1279.3568  
MALDI-TOF: 1279.417

**Figure S3.** Elemental analysis and MALDI-TOF mass spectrum of SBUc.

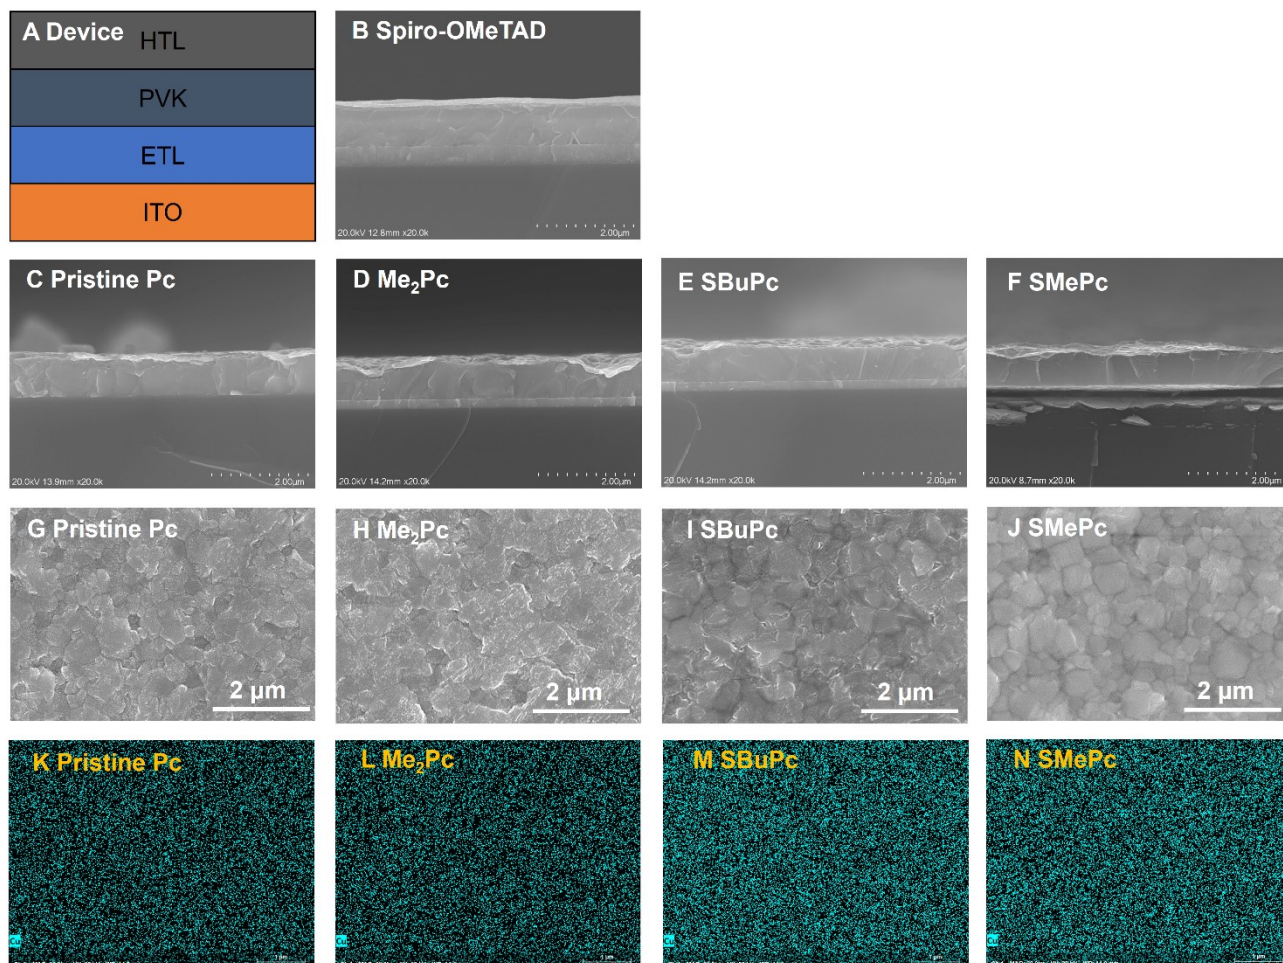

**Figure S4.** (A) Planar n-i-p PSC configuration. (B to F) Cross-sectional SEM images of the  $\text{FAPbI}_3$  based perovskite solar cell devices. (G to J) Overhead view SEM images of phthalocyanines deposited on  $\text{FAPbI}_3$ . The grains are possibly perovskites. (K to N) EDS mapping data of the Cu element for four phthalocyanines deposited on  $\text{FAPbI}_3$ .

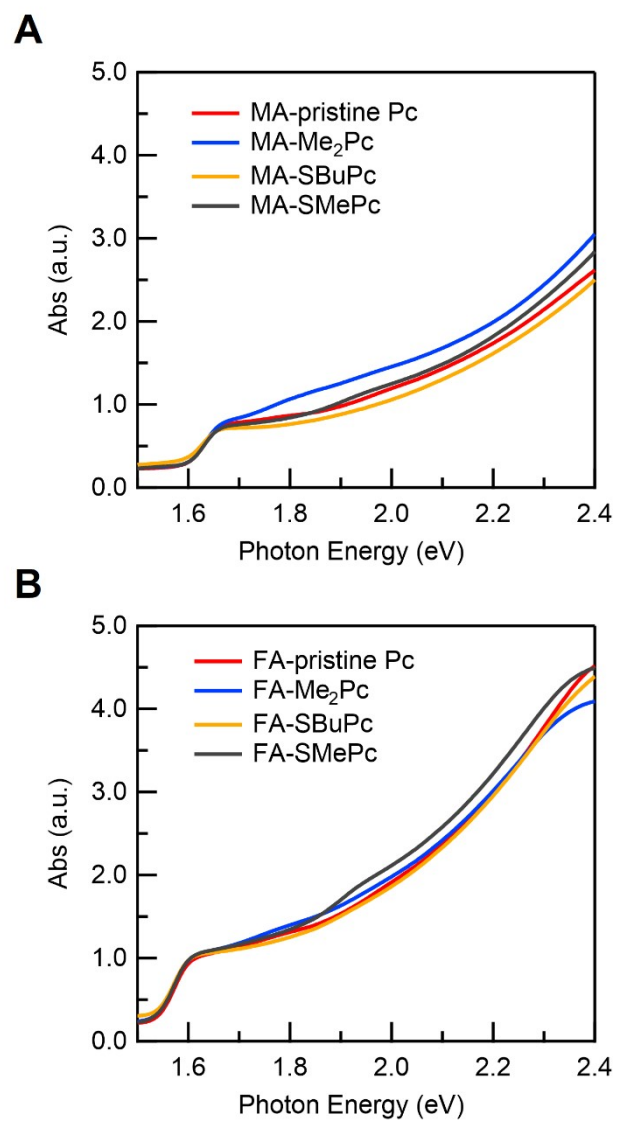

**Figure S5.** UV-vis spectra of MA and FA based perovskite films.

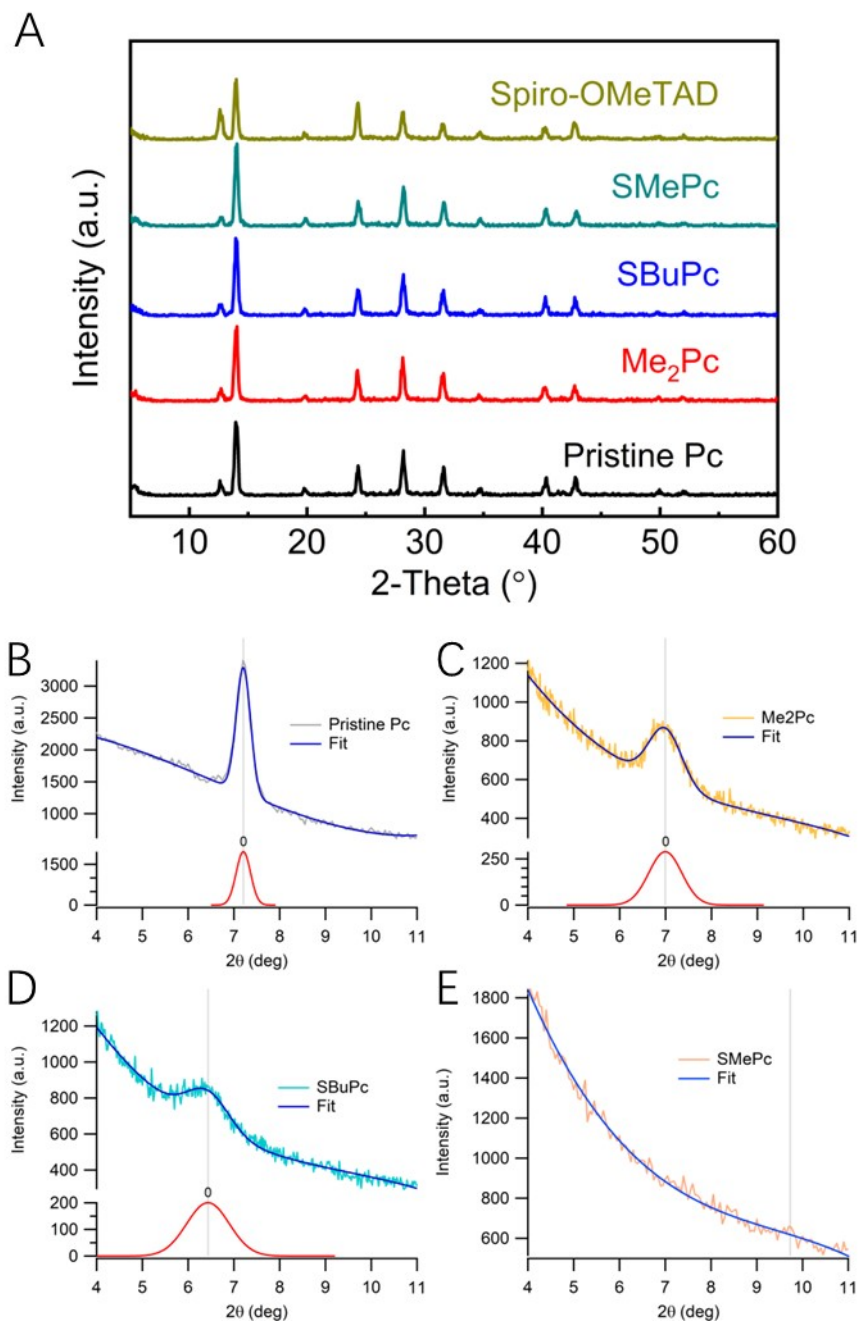

**Figure S6.** A. Powder XRD patterns of FA based perovskites with different phthalocyanine molecules. B-E GIXRD fittings at small angles for the different phthalocyanine molecules.



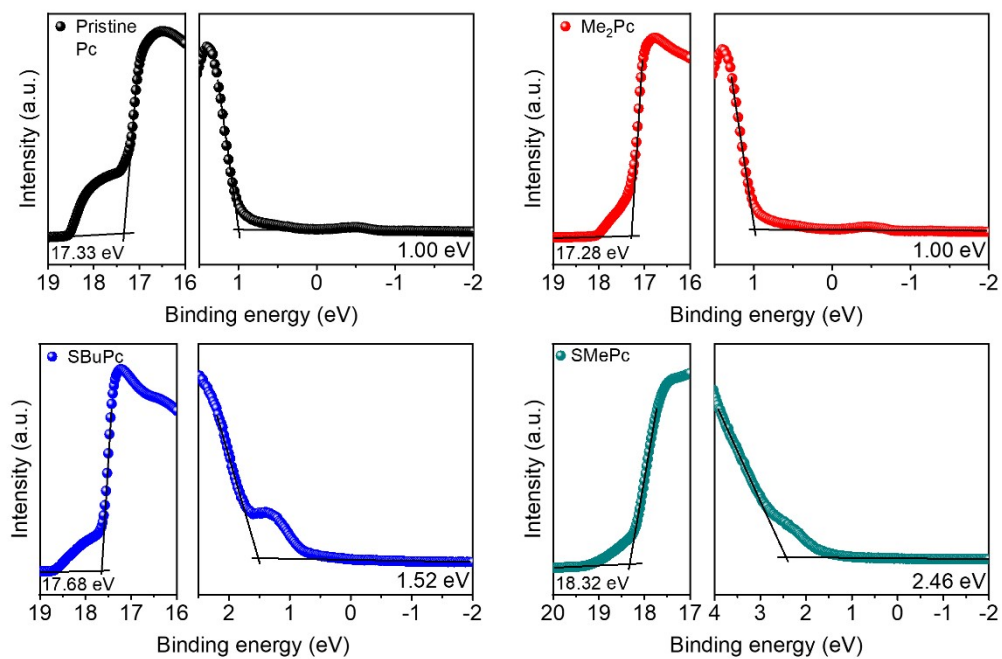

**Figure S7.** UPS of four phthalocyanine molecules.

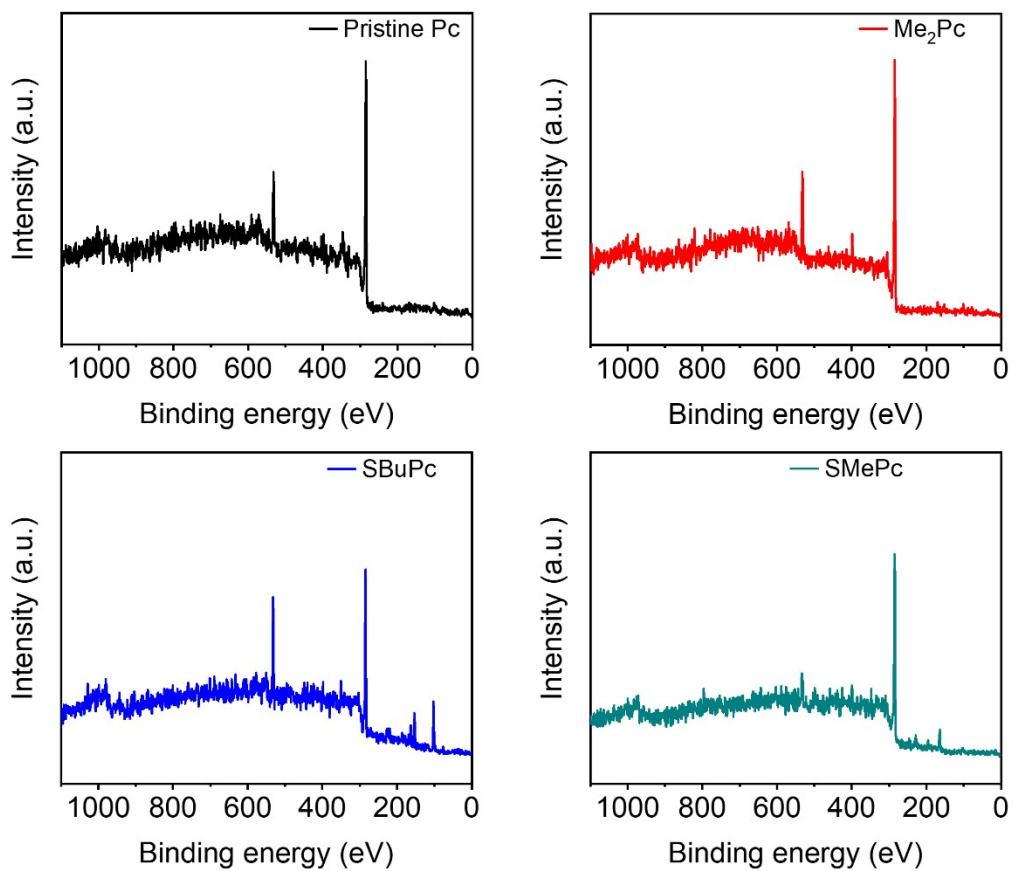

**Figure S8.** XPS data of powder phthalocyanine molecules.

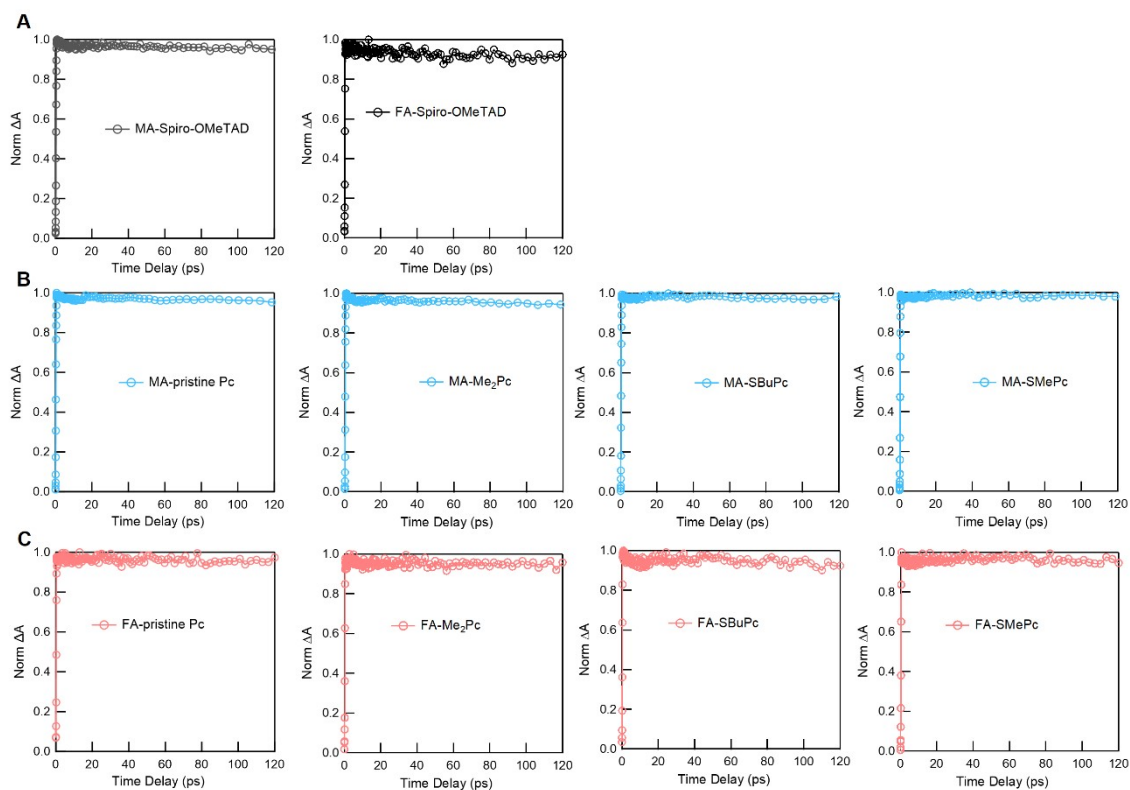

**Figure S9.** TA kinetics of perovskites excited with 1.65 eV at  $\sim 10^{17} \text{ cm}^{-3}$  carrier concentration. (A) MA and FA based perovskite with Spiro-OMeTAD. (B) MA based perovskite with phthalocyanine molecules. (C) FA based perovskite with phthalocyanine molecules.

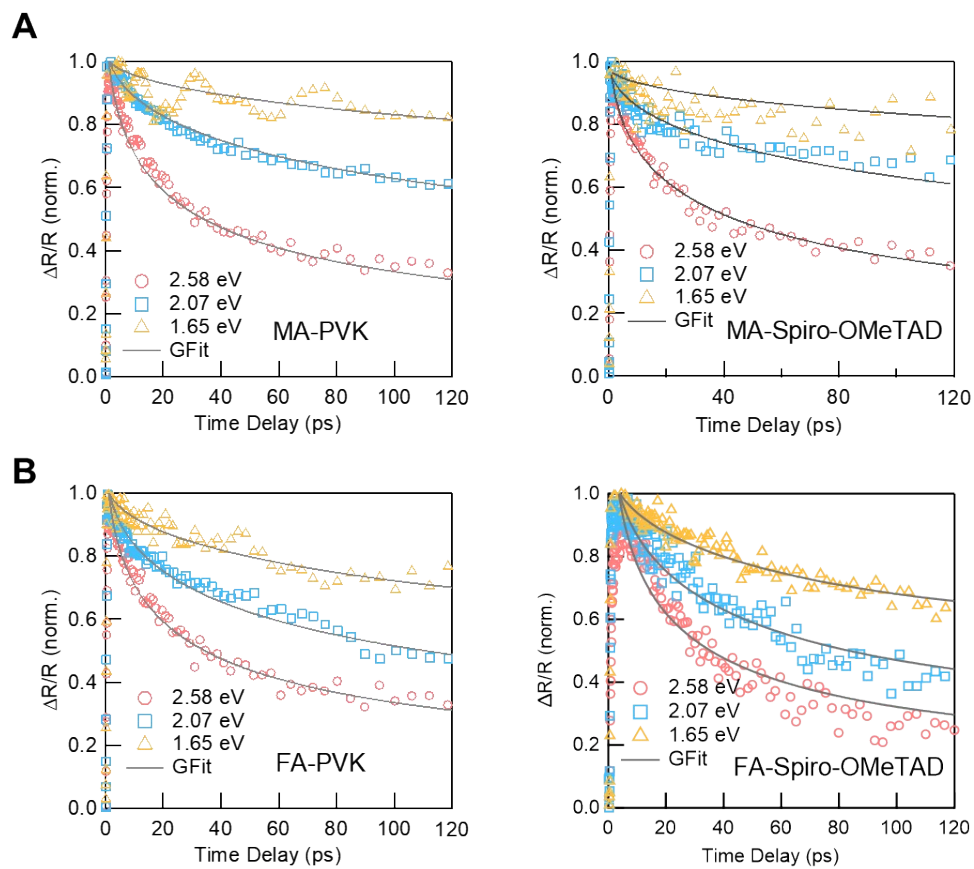

**Figure S10.** Transient reflection kinetics excited with 2.58 eV, 2.07 eV and 1.65 eV pump at  $\sim 10^{17}$   $\text{cm}^{-3}$  carrier density for MA (**A**) and FA (**B**) based perovskites with pure perovskite, Spiro-OMeTAD.

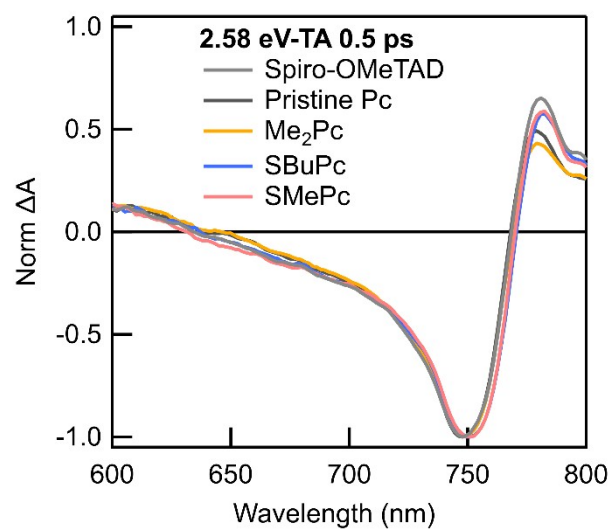

**Figure S11.** TA spectra excited with 2.58 eV with  $1.2 \times 10^{19} \text{ cm}^{-3}$  carrier density for perovskites with HTLs.

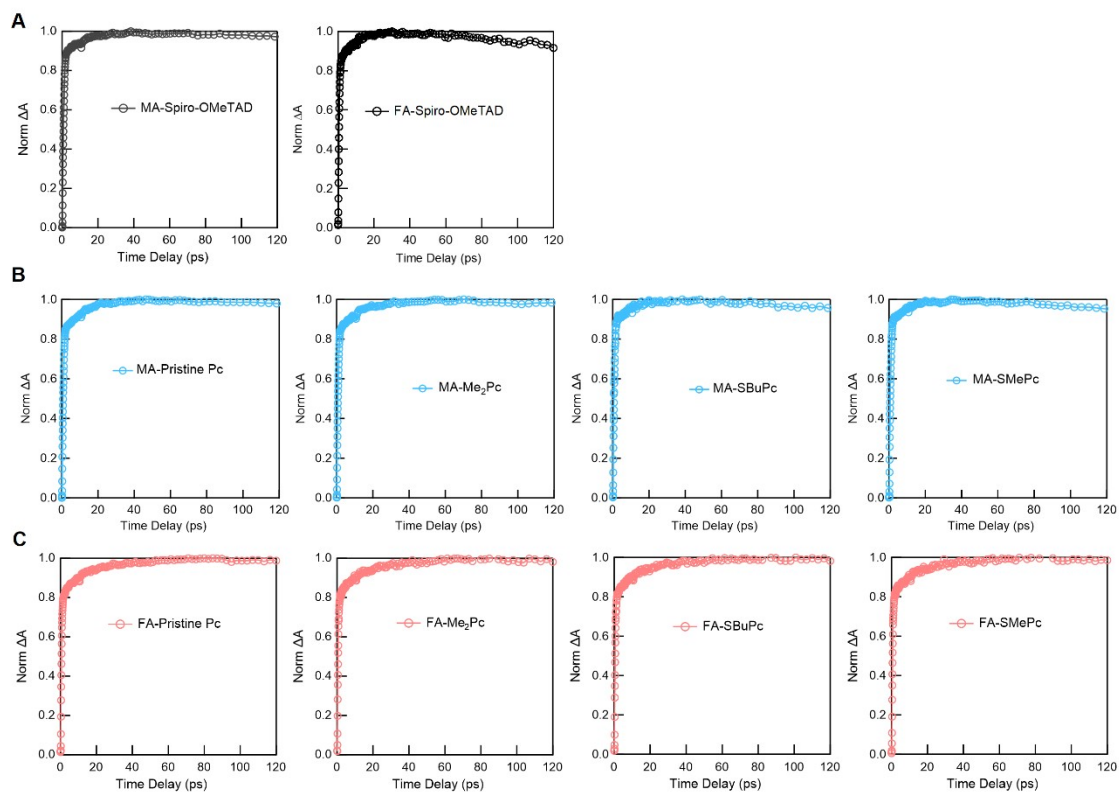

**Figure S12.** TA kinetics of perovskites excited with 2.58 eV at  $\sim 10^{19} \text{ cm}^{-3}$  carrier concentration. (A) MA and FA based perovskite with Spiro-OMeTAD. (B) MA based perovskite with phthalocyanine molecules. (C) FA based perovskite with phthalocyanine molecules.

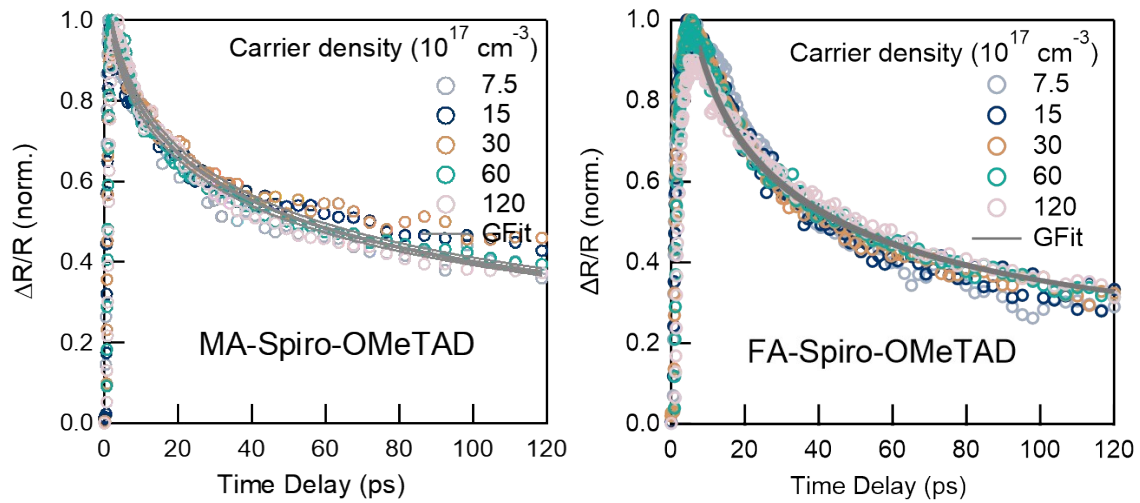

**Figure S13.** TR kinetics under various carrier densities excited at 2.58 eV pump energy, modelled with SEV for perovskites with Spiro-OMeTAD.

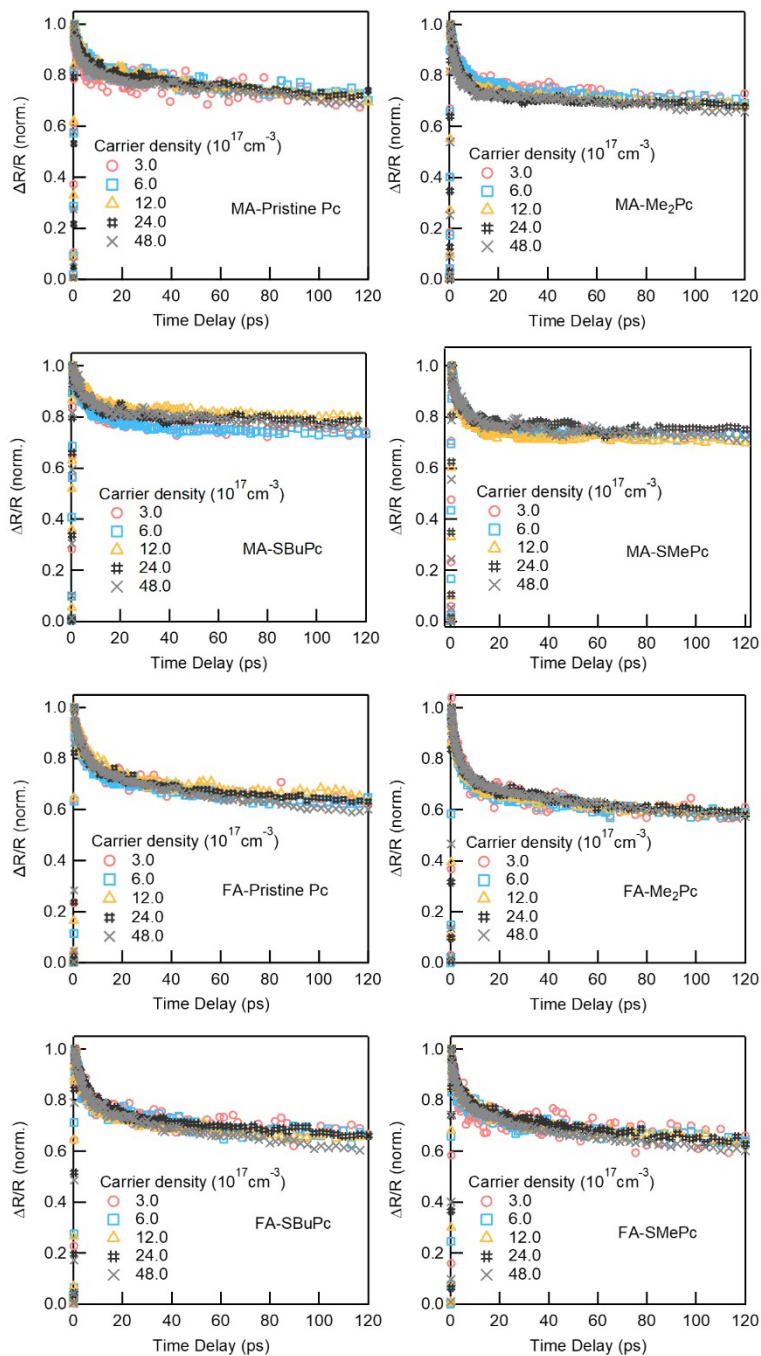

**Figure S14.** 1.65 eV pump power dependence TR kinetics result of MA and FA based perovskites. No change in carrier extraction velocity is observed.



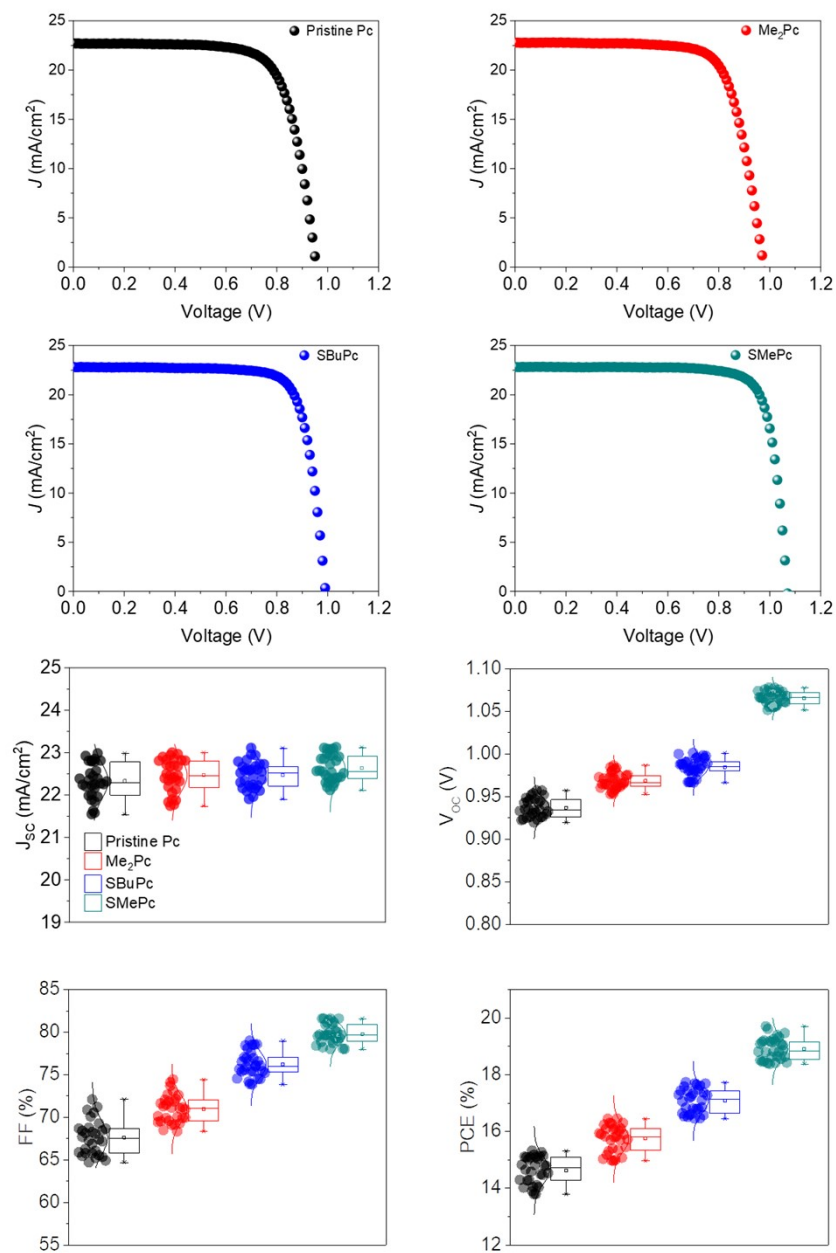

**Figure S15.** J-V curves and box plots of MA based PSCs.

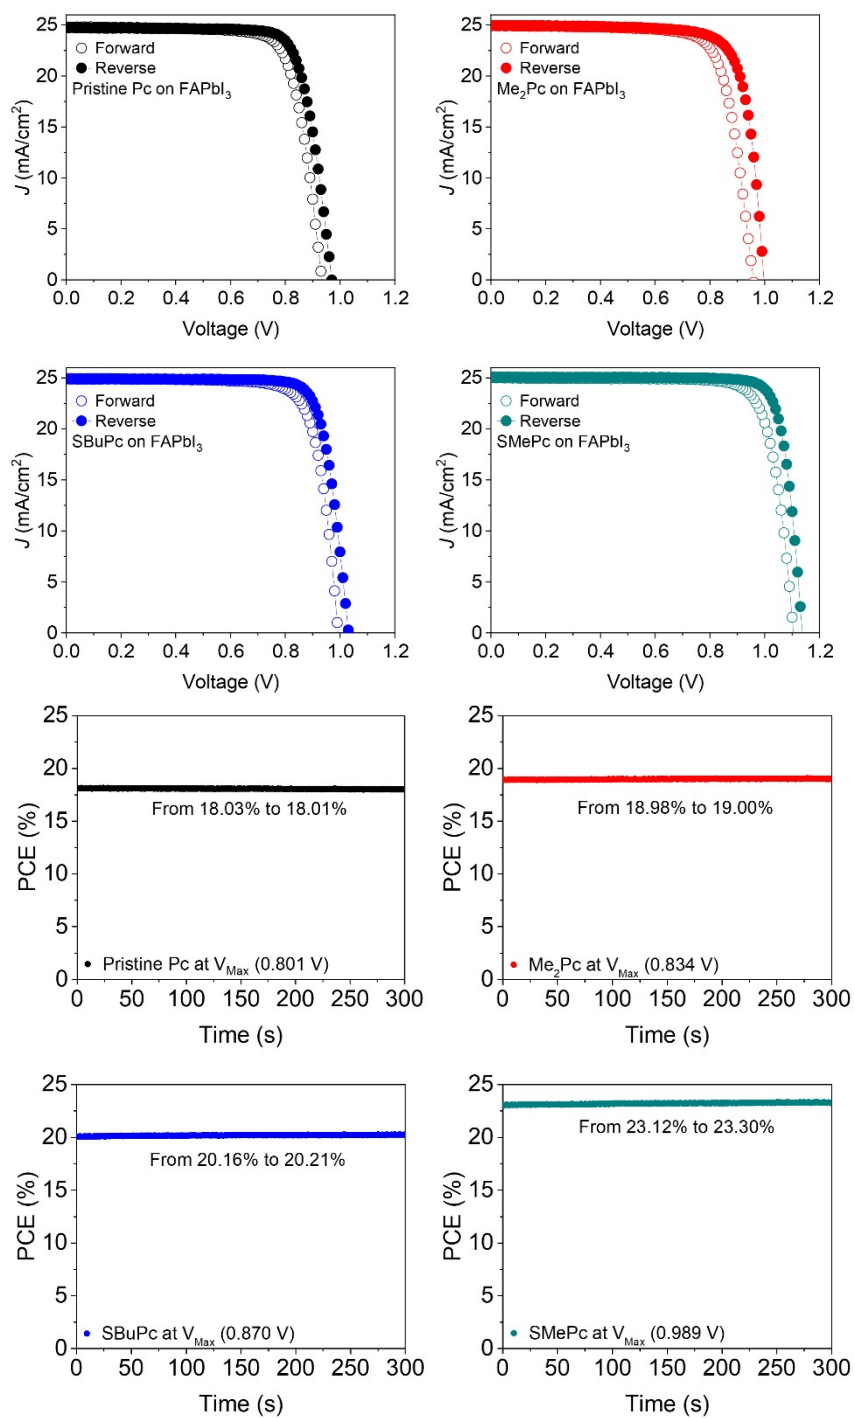

**Figure S16.** J-V curves and stabilized power output (SPO) data of FAPbI<sub>3</sub> based PSCs.

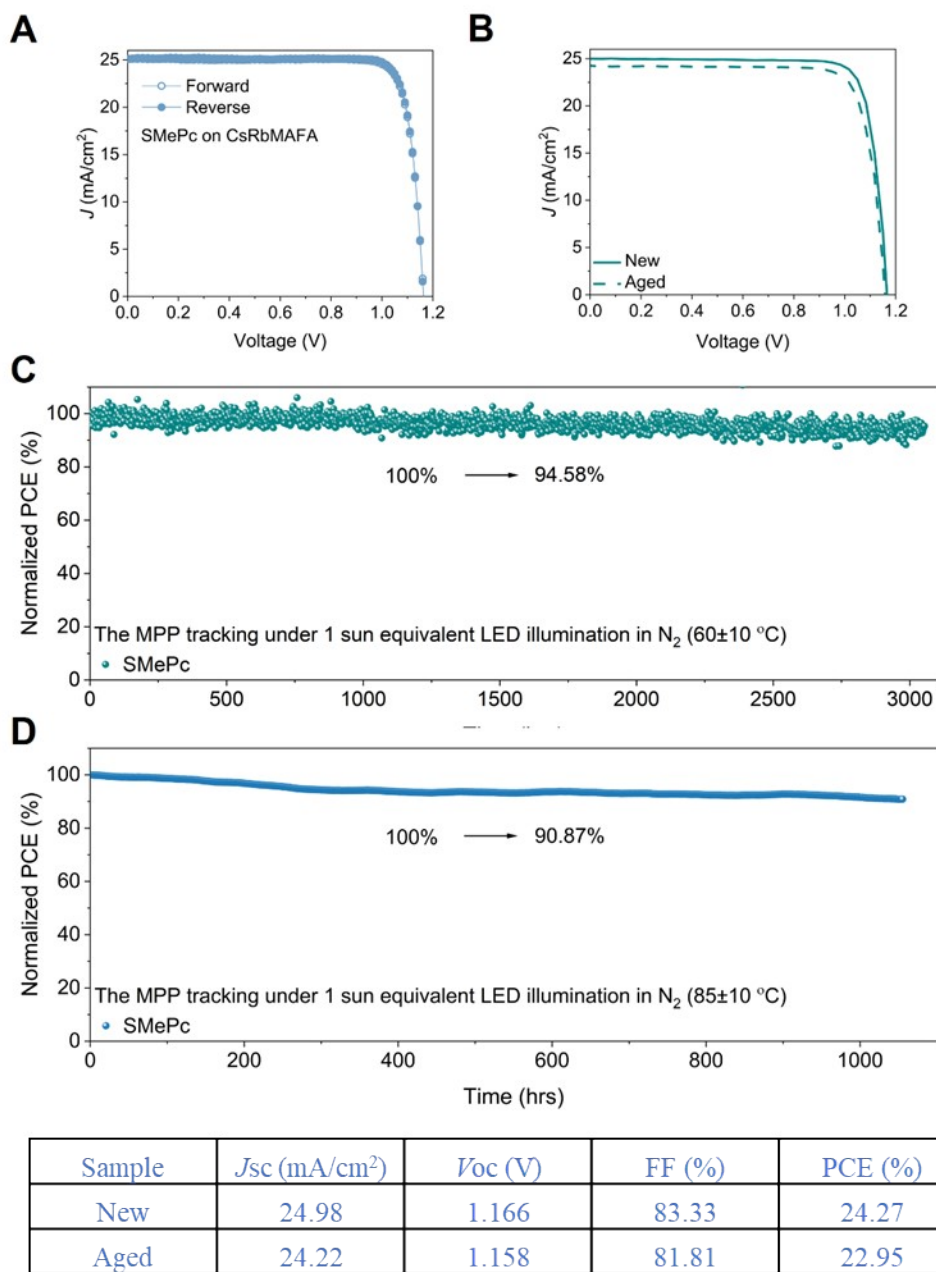

**Figure S17.** (A) J-V curves of the champion device with SMePc as HTL on FA rich CsRbMAFA perovskite film. (B) Initial and aged performance of the PSCs for stability measurement at 60°C. Stability of perovskite devices with MPP tracking at 1 sun intensity at (C) 60°C (D) 85°C.

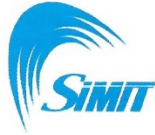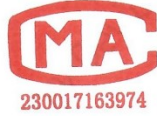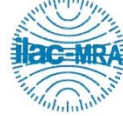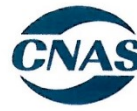

中国认可  
国际互认  
检测  
TESTING  
CNAS L8490

Test and Calibration Center of New Energy Device and Module,  
Shanghai Institute of Microsystem and Information Technology,  
Chinese Academy of Sciences (SIMIT)

# Measurement Report

Report No. 23TR071307

**Client Name** Southern University of Science and Technology (SUSTech)

---

**Client Address** No. 1088 Xueyuan Avenue, Nanshan District, Shenzhen, China

---

**Sample** Perovskite solar cell

---

**Manufacturer** Zongxiang Xu's Group, SUSTech

---

**Measurement Date** 13<sup>th</sup> July, 2023

---

**Performed by:** Qiang Shi *Qiang shi* **Date:** 13/07/2023

**Reviewed by:** Wenjie Zhao *wenjie zhao* **Date:** 13/07/2023

**Approved by:** Yucheng Liu *Yucheng liu* **Date:** 13/07/2023

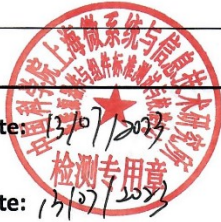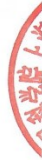

**Address:** No.235 Chengbei Road, Jiading, Shanghai **Post Code:**201800

**E-mail:** solarcell@mail.sim.ac.cn **Tel:** +86-021-69976921

The measurement report without signature and seal are not valid.  
This report shall not be reproduced, except in full, without the approval of SIMIT.

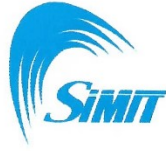

| Sample Information      |                              |
|-------------------------|------------------------------|
| Sample Type             | Perovskite Solar Cell        |
| Serial No.              | 9-A#                         |
| Lab Internal No.        | 23071301-7#                  |
| Measurement Item        | I-V characteristic           |
| Measurement Environment | 25.3 ± 2.0°C, 44.1 ± 5.0%R.H |

**Measurement of I-V characteristic**

|                                                          |                                                                                                                                                                                                                                                 |
|----------------------------------------------------------|-------------------------------------------------------------------------------------------------------------------------------------------------------------------------------------------------------------------------------------------------|
| Reference cell                                           | PVM 1121                                                                                                                                                                                                                                        |
| Reference cell Type                                      | mono-Si, WPVS, calibrated by NREL (Certificate No. ISO 2075)                                                                                                                                                                                    |
| Calibration Value/Date of Calibration for Reference cell | 144.53mA/ Feb. 2023                                                                                                                                                                                                                             |
| Measurement Conditions                                   | Standard Test Condition (STC):<br>Spectral Distribution: AM1.5 according to IEC 60904-3 Ed.3,<br>Irradiance: 1000 ± 50W/m <sup>2</sup> , Temperature: 25 ± 2°C                                                                                  |
| Measurement Equipment/ Date of Calibration               | AAA Steady State Solar Simulator (YSS-T155-2M) / July.2022<br>IV test system (ADCMT 6246) / June. 2023<br>SR Measurement system (CEP-25ML-CAS) / April.2023<br>Measuring Microscope (MF-B2017C) / July.2022                                     |
| Measurement Method                                       | I-V Measurement:<br>Logarithmic sweep in both directions (Voc to Isc and Isc to Voc) during one flash based on IEC 60904-1:2020;<br>Spectral Mismatch factor was calculated according to IEC 60904-7 and I-V correction according to IEC 60891. |
| Measurement Uncertainty                                  | Area: 1.0%(k=2); Isc: 1.8%(k=2); Voc: 1.0%(k=2);<br>Pmax: 2.3%(k=2); Eff: 2.5%(k=2)                                                                                                                                                             |

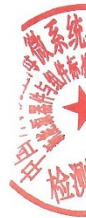

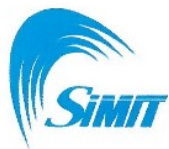

====Measurement Results====

|      | Forward Scan<br>(Isc to Voc) | Reverse Scan<br>(Voc to Isc) |
|------|------------------------------|------------------------------|
| Area | 3.97 mm <sup>2</sup>         |                              |
| Isc  | 0.995 mA                     | 0.996 mA                     |
| Voc  | 1.159 V                      | 1.161 V                      |
| Pmax | 0.969 mW                     | 0.970 mW                     |
| Ipm  | 0.942 mA                     | 0.946 mA                     |
| Vpm  | 1.029 V                      | 1.025 V                      |
| FF   | 84.03 %                      | 83.80 %                      |
| Eff  | 24.40 %                      | 24.43 %                      |

- Spectral Mismatch Factor: SMM=0.9867.
- Designated illumination area defined by a thin metal mask was measured by the measuring microscope.
- Test results listed in this measurement report refer exclusively to the mentioned measured sample.
- The results apply only at the time of the test, and do not imply future performance.

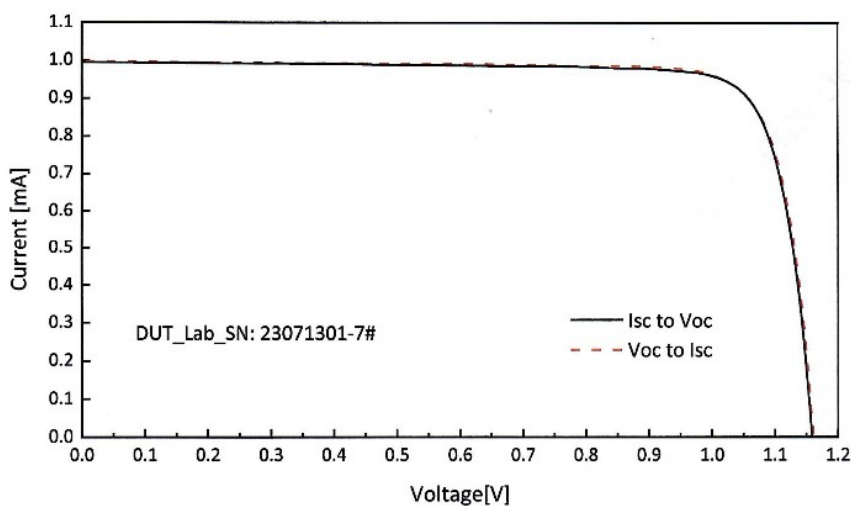

Fig.1 I-V curves of the measured sample

-----End of Report-----

Figure S18. Certification results for FA rich CsRbMAFA perovskite with SMePc as HTL.

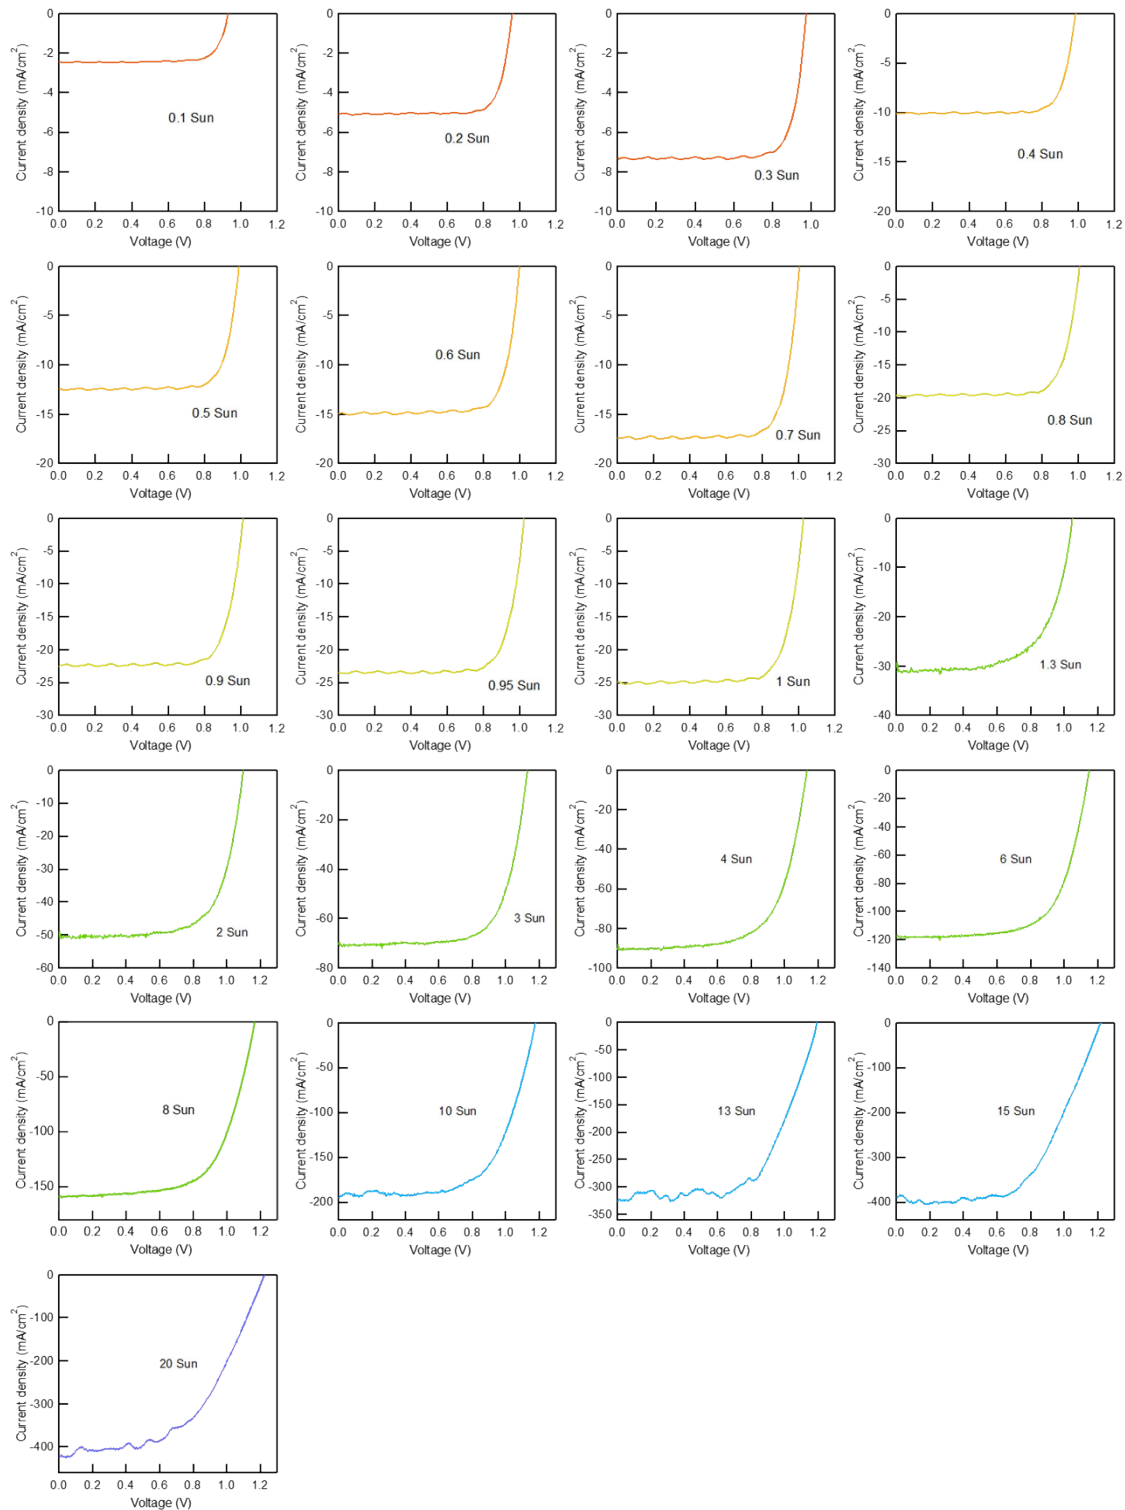

**Figure S19.** Measured J–V characteristics of the device with SBUc under simulated concentrated AM 1.5 G sunlight at various irradiance levels for FAPbI<sub>3</sub>.

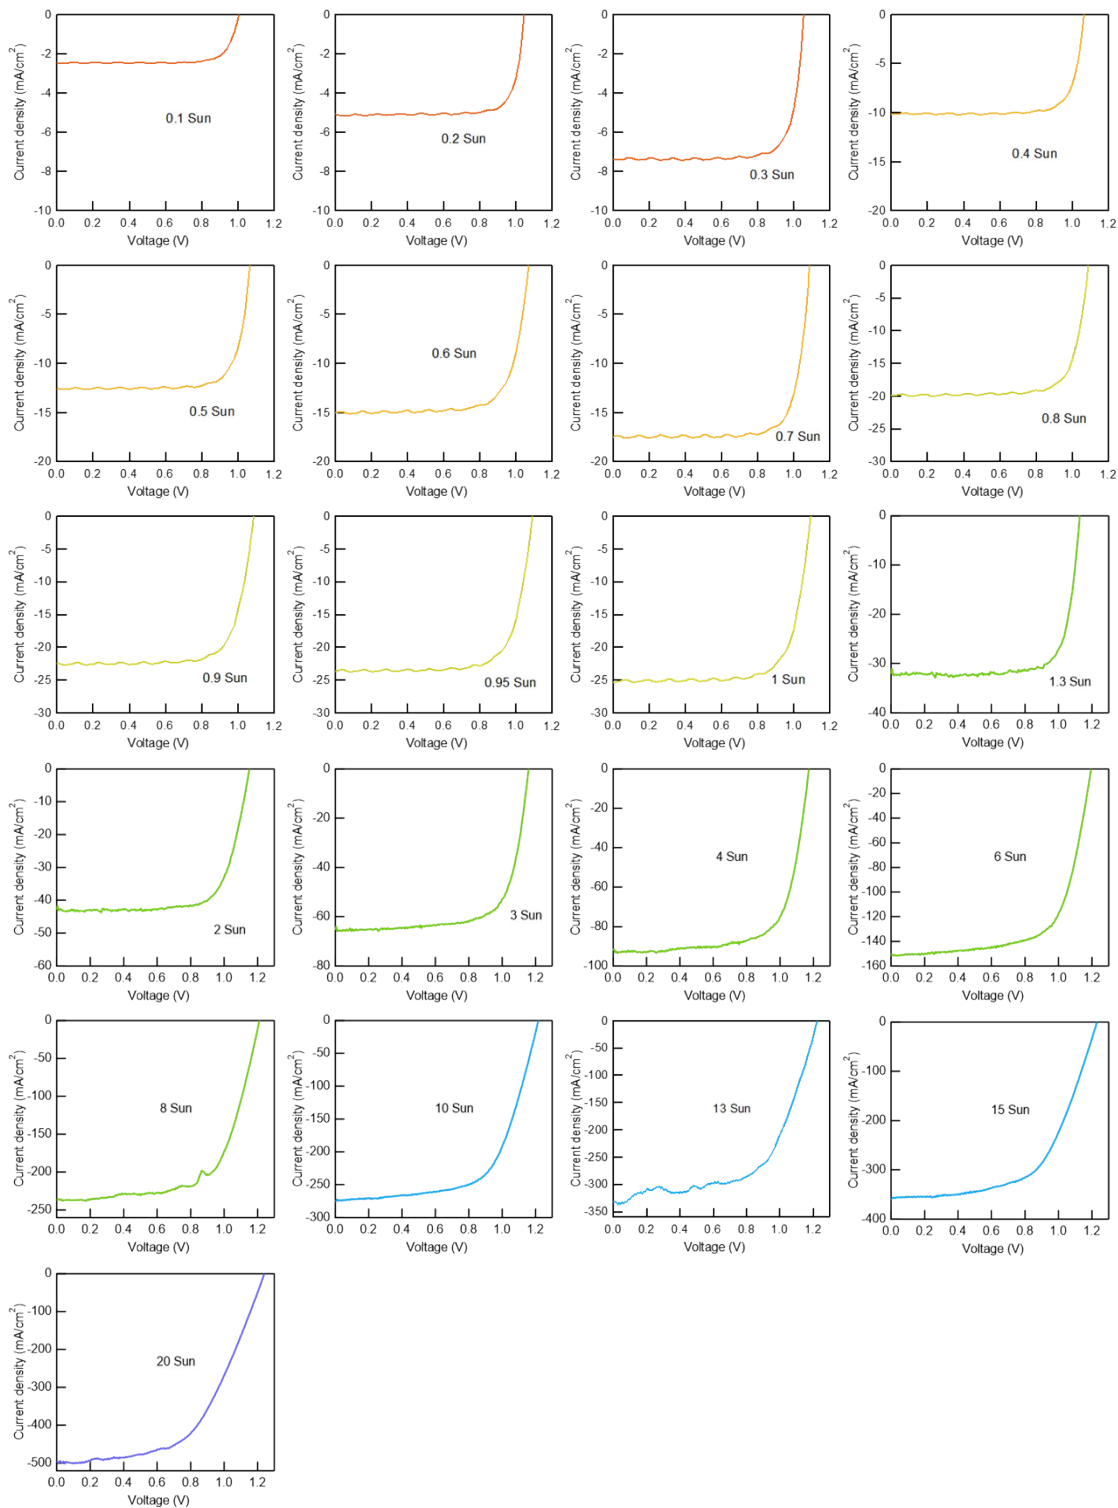

**Figure S20.** Measured J-V characteristics of the device with SMePc under simulated concentrated AM 1.5 G sunlight at various irradiance levels for FAPbI<sub>3</sub>.



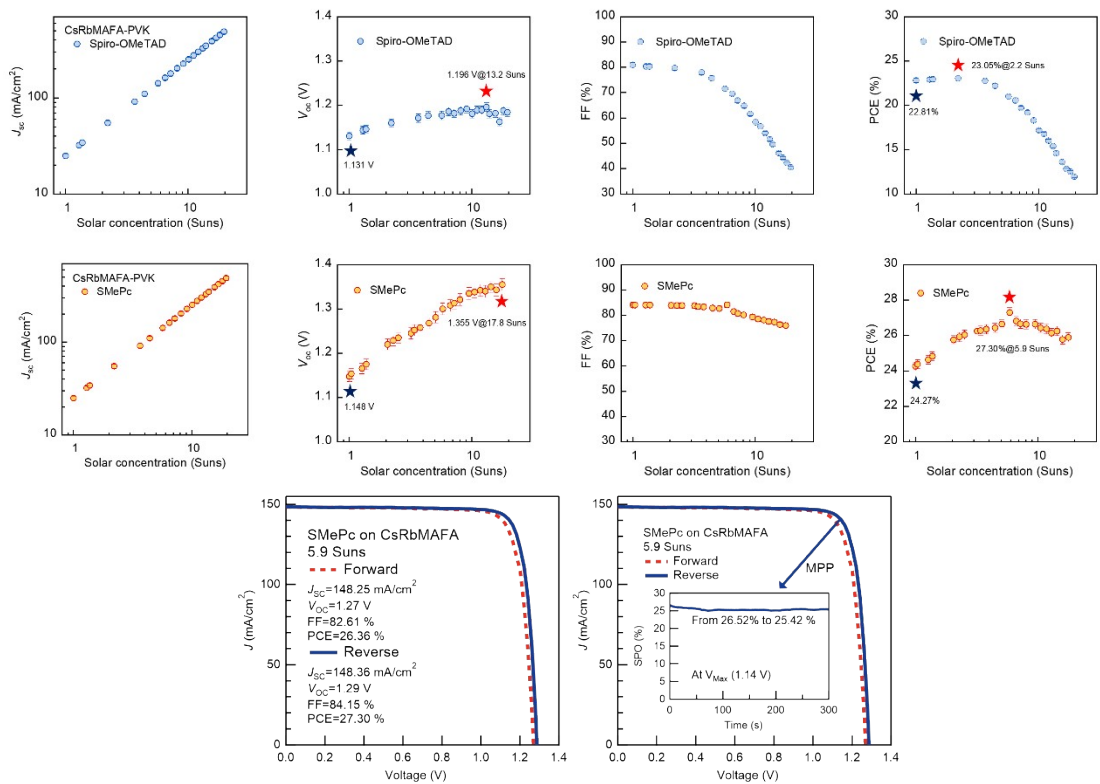

**Figure S21.** Concentrator PV device performance of champion FA rich perovskites with Spiro-OMeTAD and SMePc as HTL at various solar concentration.

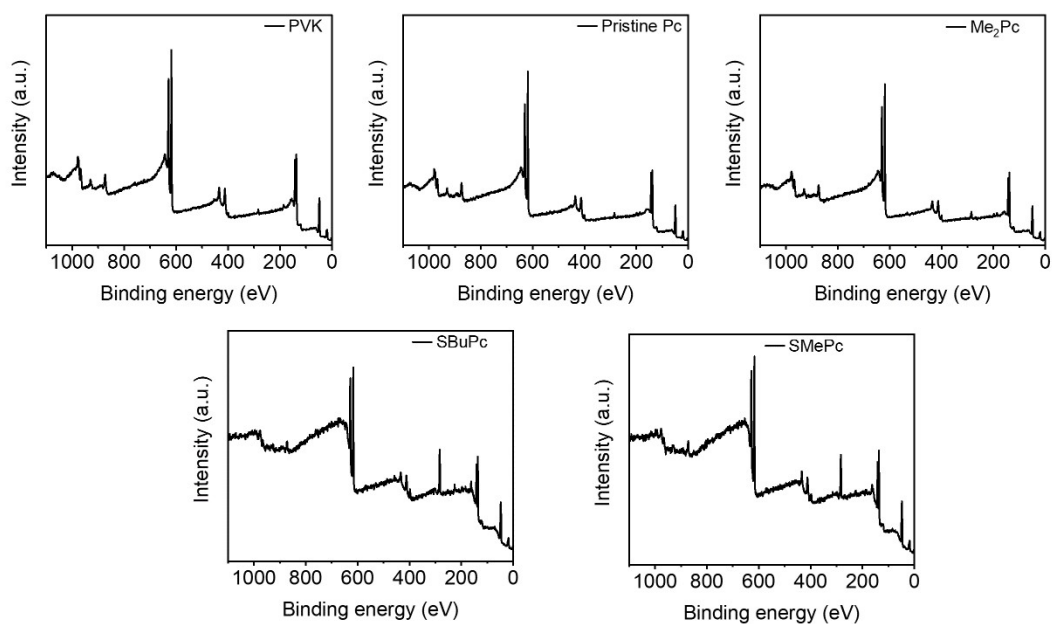

**Figure S22.** Full XPS scan survey spectra for FA based samples with and without Pcs.

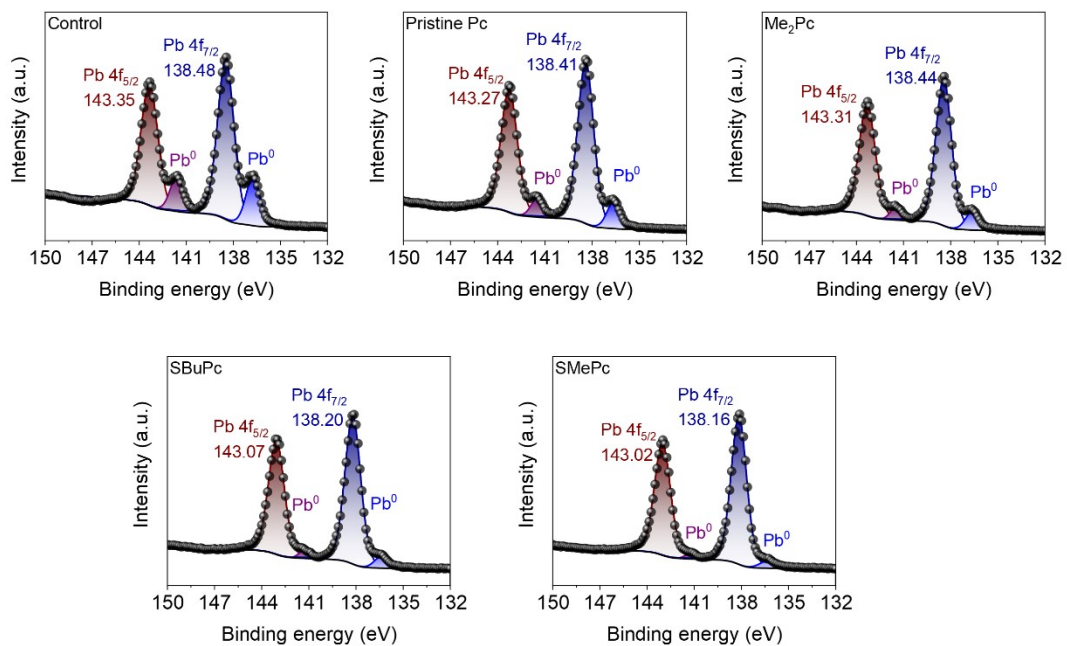

**Figure S23.** Pb 4f XPS spectra for perovskite samples without HTL (Control) and with HTLs (pristine Pc, Me<sub>2</sub>Pc, SBuPc and SMePc).

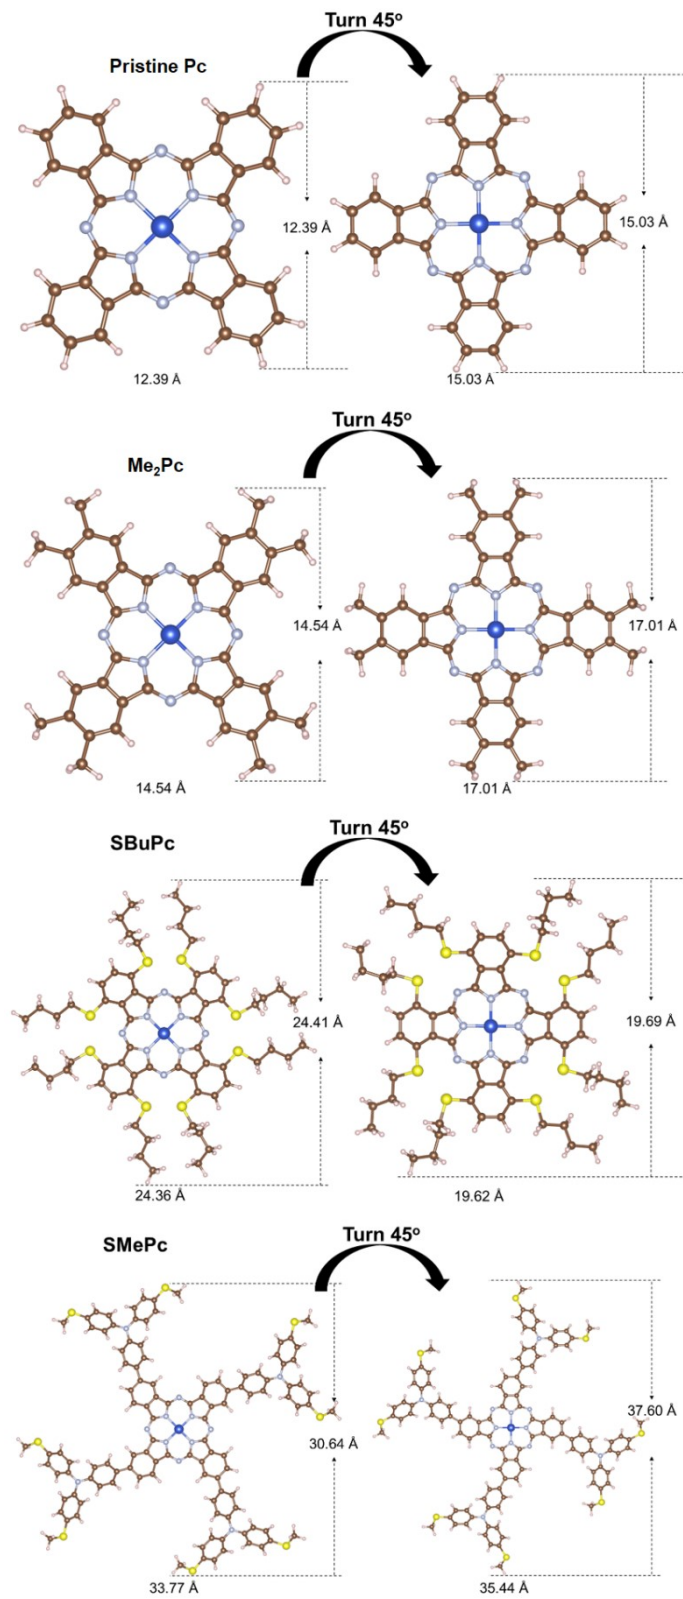

**Figure S24.** Molecular length parameters provided from static DFT calculation.

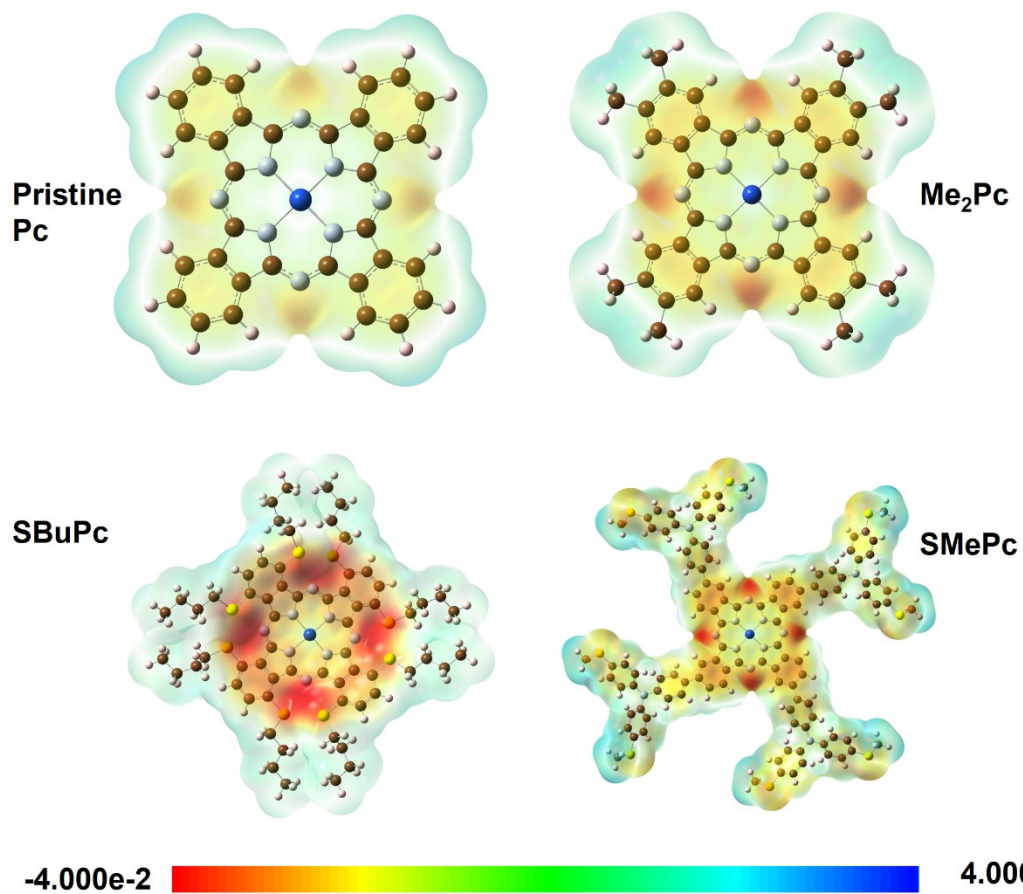

**Figure S25.** Electrostatic potential surface (EPS) for Pcs molecules. The blue regions represent positively charged species, while the red regions represent the negatively-charged species.

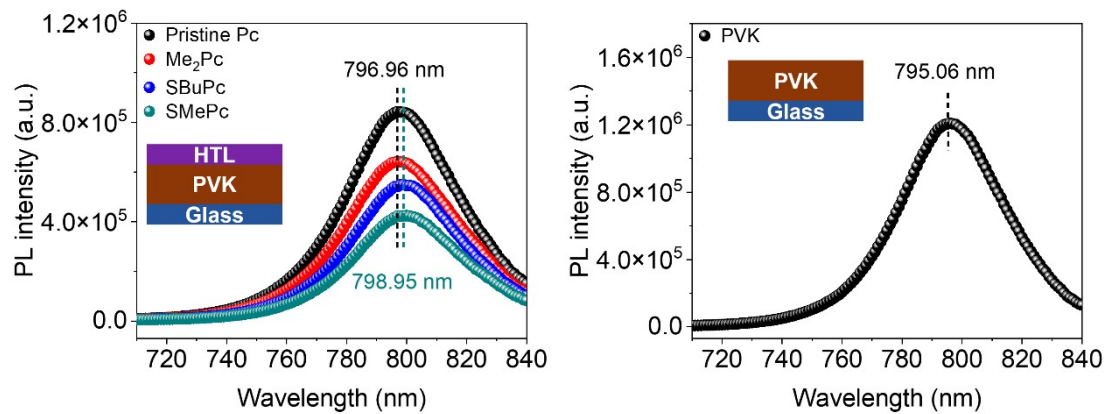

**Figure S26.** PL spectra for perovskite samples without HTL (Control) and with HTLs (Pristine Pc, Me<sub>2</sub>Pc, SBUc and SMePc).

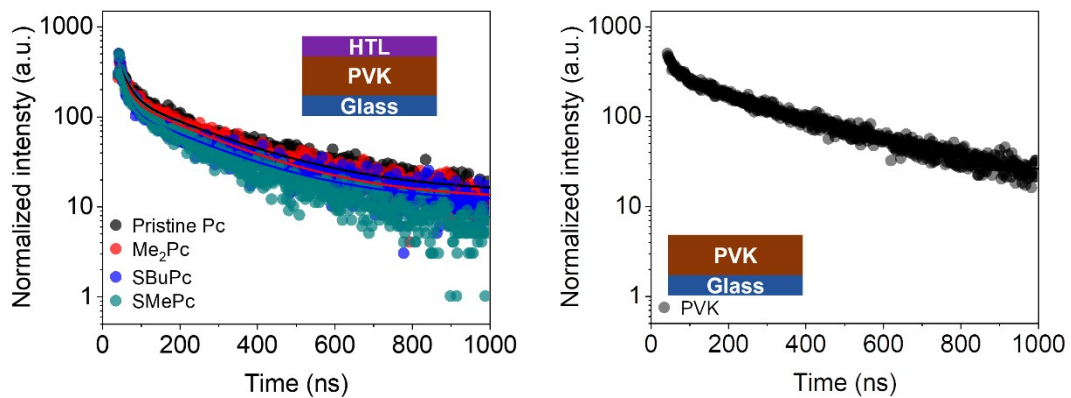

**Figure S27.** TRPL spectra for perovskite samples without HTL (right) and with HTLs (left).

### 3. Tables S1 to S10

**Table S1.** Fitted SEV/SRV values of MA perovskite-based samples.

| Sample              | SEV/SRV (cm/s)   |
|---------------------|------------------|
| Pristine perovskite | $800 \pm 400$    |
| Spiro-OMeTAD        | $1500 \pm 200$   |
| Pristine Pc         | $10100 \pm 2200$ |
| Me <sub>2</sub> Pc  | $11200 \pm 1800$ |
| SBuPc               | $16500 \pm 1600$ |
| SMePc               | $19300 \pm 2600$ |

**Table S2.** Global fitted SEV values of FA based samples

| Sample              | SEV/SRV (cm/s)   |
|---------------------|------------------|
| Pristine perovskite | $200 \pm 120$    |
| Spiro-OMeTAD        | $2600 \pm 600$   |
| Pristine Pc         | $11500 \pm 850$  |
| Me <sub>2</sub> Pc  | $12900 \pm 1000$ |
| SBuPc               | $17600 \pm 1300$ |
| SMePc               | $21900 \pm 1500$ |



**Table S3** The SEV values of selected organic HTLs at different carrier density with MA based perovskites

| Carrier Density<br>(cm <sup>-3</sup> ) | Surface Extraction Velocity (cm/s) |              |                    |              |              |
|----------------------------------------|------------------------------------|--------------|--------------------|--------------|--------------|
|                                        | Spiro-OMeTAD                       | Pristine Pc  | Me <sub>2</sub> Pc | SBuPc        | SMePc        |
| 7.5 × 10 <sup>17</sup>                 | 1500 ± 200                         | 10100 ± 2800 | 11200 ± 1100       | 16500 ± 1900 | 19300 ± 1500 |
| 1.5 × 10 <sup>18</sup>                 | 1500 ± 200                         | 14300 ± 2900 | 15300 ± 1300       | 22200 ± 2000 | 27100 ± 1900 |
| 3.0 × 10 <sup>18</sup>                 | 1520 ± 200                         | 18000 ± 2900 | 18700 ± 1500       | 34500 ± 2100 | 41700 ± 1800 |
| 6.0 × 10 <sup>18</sup>                 | 1680 ± 200                         | 22200 ± 2800 | 24400 ± 1600       | 43700 ± 2200 | 52600 ± 1700 |
| 1.2 × 10 <sup>19</sup>                 | 2650 ± 400                         | 29300 ± 3000 | 33000 ± 1600       | 54700 ± 2200 | 65200 ± 1900 |

**Table S4** The SEV values of selected organic HTLs at different carrier density with FA based perovskites.

| Carrier Density<br>(cm <sup>-3</sup> ) | Surface Extraction Velocity (cm/s) |              |                    |              |              |
|----------------------------------------|------------------------------------|--------------|--------------------|--------------|--------------|
|                                        | Spiro-OMeTAD                       | Pristine Pc  | Me <sub>2</sub> Pc | SBuPc        | SMePc        |
| 7.5 × 10 <sup>17</sup>                 | 2600 ± 700                         | 11500 ± 1400 | 12900 ± 2100       | 17600 ± 1700 | 21900 ± 2600 |
| 1.5 × 10 <sup>18</sup>                 | 2600 ± 600                         | 14500 ± 1500 | 16200 ± 2000       | 26100 ± 2600 | 33600 ± 2900 |
| 3.0 × 10 <sup>18</sup>                 | 3300 ± 600                         | 18400 ± 1500 | 21200 ± 2000       | 37500 ± 2500 | 50200 ± 2900 |
| 6.0 × 10 <sup>18</sup>                 | 3900 ± 600                         | 23600 ± 1400 | 28000 ± 1900       | 50700 ± 2600 | 62400 ± 3000 |
| 1.2 × 10 <sup>19</sup>                 | 4400 ± 400                         | 32300 ± 1100 | 36600 ± 1800       | 60200 ± 2600 | 78900 ± 3100 |

**Table S5.** Photovoltaic parameters of MA based perovskites solar cells with pristine Pc, Me<sub>2</sub>Pc, SBUc and SMePc.

| Sample             | J <sub>SC</sub> (mA/cm <sup>2</sup> ) | V <sub>OC</sub> (V) | FF (%)       | PCE (%)      |
|--------------------|---------------------------------------|---------------------|--------------|--------------|
| Pristine Pc        | 22.33 ± 0.61                          | 0.94 ± 0.02         | 67.61 ± 3.02 | 14.63 ± 0.72 |
| Me <sub>2</sub> Pc | 22.46 ± 0.58                          | 0.97 ± 0.01         | 70.98 ± 2.46 | 15.74 ± 0.71 |
| SBUc               | 22.47 ± 0.46                          | 0.98 ± 0.02         | 76.21 ± 2.24 | 17.08 ± 0.64 |
| SMePc              | 22.64 ± 0.48                          | 1.07 ± 0.01         | 79.79 ± 1.76 | 18.92 ± 0.58 |

**Table S6.** PV performance for FA-based perovskites devices.

| Sample             |         | J <sub>SC</sub><br>(mA/cm <sup>2</sup> ) | V <sub>OC</sub><br>(V) | FF<br>(%) | PCE<br>(%) | Hysteresis<br>index |
|--------------------|---------|------------------------------------------|------------------------|-----------|------------|---------------------|
| Pristine Pc        | Forward | 24.80                                    | 0.94                   | 76.12     | 17.65      | 0.05                |
|                    | Reverse | 24.74                                    | 0.97                   | 77.78     | 18.66      |                     |
| Me <sub>2</sub> Pc | Forward | 24.92                                    | 0.96                   | 76.27     | 18.23      | 0.07                |
|                    | Reverse | 24.95                                    | 1.00                   | 78.71     | 19.60      |                     |
| SBUc               | Forward | 24.94                                    | 0.99                   | 78.77     | 19.50      | 0.06                |
|                    | Reverse | 24.92                                    | 1.03                   | 80.81     | 20.75      |                     |
| SMePc              | Forward | 25.03                                    | 1.11                   | 79.93     | 22.12      | 0.06                |
|                    | Reverse | 25.07                                    | 1.14                   | 82.75     | 23.59      |                     |

**Table S7.** PV performance for dopant free HTM devices.

| HTM          | V <sub>oc</sub><br>(V) | J <sub>sc</sub><br>(mA/cm <sup>2</sup> ) | FF<br>(%)    | PCE<br>(%)   | Certified<br>PCE<br>(%) | Ref                                                         |
|--------------|------------------------|------------------------------------------|--------------|--------------|-------------------------|-------------------------------------------------------------|
| BDT-C8-3O    | 1.163                  | 25.51                                    | 81.31        | 24.11        | 23.82                   | <i>Angew. Chem. Int. Ed.</i> , 2023, <b>62</b> , e202312231 |
| BTP1-2       | 1.178                  | 24.95                                    | 82.83        | 24.34        | -                       | <i>Angew. Chem. Int. Ed.</i> , 2023, <b>62</b> , e202218752 |
| PMPe         | 1.19                   | 25.07                                    | 82.17        | 24.53        | -                       | <i>J. Am. Chem. Soc.</i> , 2022, <b>144</b> , 9500-9509     |
| GA-P3HT      | 1.15                   | 25.5                                     | 83.8         | 24.6         | -                       | <i>Energy Environ. Sci.</i> , 2021, <b>14</b> , 2419        |
| PTAA-P1      | 1.17                   | 25.50                                    | 83.28        | 24.89        | 24.50                   | <i>Adv. Mater.</i> , 2023, <b>35</b> , 2208431              |
| <b>SMePc</b> | <b>1.163</b>           | <b>25.10</b>                             | <b>85.45</b> | <b>24.95</b> | <b>24.43</b>            | <b>This work</b>                                            |

**Table S8. PV**

| PVK                                                                                                 | HTM          | 1Sun PCE (%) | Concentrated PCE (%) | Solar Concentration (Suns) | J. Energy ACS App |
|-----------------------------------------------------------------------------------------------------|--------------|--------------|----------------------|----------------------------|-------------------|
| $\text{Cs}_{0.05}(\text{FA}_{0.9}\text{MA}_{0.1})_{0.95}\text{Pb}(\text{I}_{0.9}\text{Br}_{0.1})_3$ | Spiro-OMeTAD | 19.4         | 20.3                 | 3                          | J. Energy ACS App |
| $\text{CsMAFAPbIBr}$                                                                                | Spiro-OMeTAD | 20.5         | 21.1                 | 10                         | ACS App           |
| $(\text{FAPbI}_3)_{0.875}(\text{MAPbBr}_3)_{0.125}(\text{CsPbI}_3)_{0.1}$                           | Spiro-OMeTAD | 21.0         | 21.6                 | 1.78                       | Sustain           |
| $\text{FA}_{0.83}\text{Cs}_{0.17}\text{PbI}_{2.7}\text{Br}_{0.3}$                                   | Spiro-OMeTAD | 21.1         | 23.6                 | 14.49                      | Nat.              |
| $(\text{FASnI}_3)_{0.6}(\text{MAPbI}_3)_{0.4}$                                                      | PEDOT:PSS    | 21.18        | 22.36                | 4.17                       | ACS App           |
| $\text{CsFAPbIBr}$                                                                                  | CuSCN        | 22.46        | 24.93                | 40                         | J Phys            |
| $\text{Cs}_{0.04}\text{Rb}_{0.02}\text{MA}_{0.02}\text{FA}_{0.92}\text{PbI}_3$                      | <b>SMcPc</b> | <b>24.27</b> | <b>27.30</b>         | <b>5.9</b>                 |                   |

**Table S9.** XPS data results

| Sample       | BE(eV)             |                    |                      |                      |        |                    |                    |       | A |
|--------------|--------------------|--------------------|----------------------|----------------------|--------|--------------------|--------------------|-------|---|
|              | SOX <sub>1/2</sub> | SOX <sub>3/2</sub> | C-S-C <sub>1/2</sub> | C-S-C <sub>3/2</sub> | Pb-S   | SOX <sub>1/2</sub> | SOX <sub>3/2</sub> | C-S-C |   |
| SBUc         | 169.42             | 167.56             | 164.05               | 162.85               | \      | 3.0                | 5.9                | 42    |   |
| SBUc w/ PVK  | 169.46             | 168.46             | 164.12               | 162.94               | 161.12 | 2.7                | 2.8                | 42    |   |
| SMePc        | 168.23             | 166.51             | 164.48               | 163.36               | \      | 6.3                | 11.9               | 47    |   |
| SMePc w/ PVK | 168.45             | 166.37             | 165.02               | 163.84               | 161.44 | 9.3                | 9.9                | 15    |   |

**Table S10.** Summary of the parameters from fitting to the TRPL measurement data

| Sample             | A <sub>1</sub> (%) | $\tau_1$ (ns) | A <sub>2</sub> (%) | $\tau_2$ (ns) | $\tau_{Ave}$ (ns) |
|--------------------|--------------------|---------------|--------------------|---------------|-------------------|
| PVK                | 84.53              | 19.11         | 15.47              | 271.45        | 58.14             |
| Pristine Pc        | 88.46              | 23.31         | 11.54              | 223.58        | 46.42             |
| Me <sub>2</sub> Pc | 91.64              | 19.53         | 8.36               | 208.51        | 35.33             |
| SBuPc              | 94.85              | 17.57         | 5.15               | 207.07        | 27.32             |
| SMePc              | 95.04              | 16.36         | 4.96               | 165.18        | 23.74             |

**Table S11.** The adsorption energies of pristine Pc, Me<sub>2</sub>Pc, SBuPc, and SMePc on the perovskite surface. The adsorption energy ( $E_{\text{ads}}$ ) is obtained from  $E_{\text{ads}} = E_{\text{Pcs/PVK}} - E_{\text{Pcs}} - E_{\text{PVK}}$ , where  $E_{\text{Pcs/PVK}}$  represents the energy of adsorbed configuration, while the  $E_{\text{Pcs}}$  and  $E_{\text{PVK}}$  are the energies of the Pcs molecule and the perovskite, respectively.

| Molecule           | Total energy (au) | Perovskite energy (au) | Molecular energy (au) | Adsorption energy(au) | Adsorption energy(eV) |
|--------------------|-------------------|------------------------|-----------------------|-----------------------|-----------------------|
| Pristine Pc        | -7516.35          | -7196.88               | -318.96               | -0.51                 | -13.84                |
| Me <sub>2</sub> Pc | -7571.44          | -7196.88               | -374.01               | -0.55                 | -15.04                |
| SBuPc              | -7818.03          | -7196.88               | -620.55               | -0.605                | -16.47                |
| SMePc              | -8132.94          | -7196.88               | -935.37               | -0.69                 | -18.78                |

#### 4. References:

- S1 Qu, G. *et al.* Dopant-Free Phthalocyanine Hole Conductor with Thermal-Induced Holistic Passivation for Stable Perovskite Solar Cells with 23% Efficiency. *Adv. Funct. Mater.* **32**, 2206585, (2022).
- S2 Yang, G. *et al.* A facile molecularly engineered copper (II) phthalocyanine as hole transport material for planar perovskite solar cells with enhanced performance and stability. *Nano Energy* **31**, 322-330, (2017).
- S3 Hu, Q. *et al.* Dual Defect-Passivation Using Phthalocyanine for Enhanced Efficiency and Stability of Perovskite Solar Cells. *Small* **17**, 2005216, (2021).
- S4 Yang, Y. *et al.* Top and bottom surfaces limit carrier lifetime in lead iodide perovskite films. *Nat. Energy* **2**, 16207, (2017).
- S5 Xue, J. *et al.* Reconfiguring the band-edge states of photovoltaic perovskites by conjugated organic cations. *Science* **371**, 636, (2021).
